# Supplementary material for: Structural brain imaging in Alzheimer’s disease and mild cognitive impairment: biomarker analysis and shared morphometry database
Source: PubMed Central journal article supplement (PMC6062561; doi:10.1038/s41598-018-29295-9), 2018-07-26
Supplement: 41598_2018_29295_MOESM1_ESM.pdf [file 41598_2018_29295_MOESM1_ESM.pdf]

# Supplementary Material - Structural brain imaging in Alzheimer's disease and mild cognitive impairment: biomarker analysis and shared morphometry database

Christian Ledig<sup>1,\*</sup>, Andreas Schuh<sup>1</sup>, Ricardo Guerrero<sup>1</sup>, Rolf A. Heckemann<sup>2,3,4</sup>, Daniel Rueckert<sup>1</sup>

**1** Imperial College London, Department of Computing, London, SW7 2AZ, UK

**2** MedTech West, Sahlgrenska University Hospital, 413 45 Gothenburg, Sweden

**3** Department of Radiation Therapy, Sahlgrenska Academy, University of Gothenburg, Gothenburg, Sweden

**4** Division of Brain Sciences, Imperial College London, London

\* ledig.christian@gmail.com

## Alzheimer's Disease Neuroimaging Initiative (ADNI)

Data used in preparation of this article were obtained from the Alzheimer's Disease Neuroimaging Initiative (ADNI) database ([adni.loni.usc.edu](http://adni.loni.usc.edu)). As such, the investigators within the ADNI contributed to the design and implementation of ADNI and/or provided data but did not participate in analysis or writing of this report. A complete listing of ADNI investigators can be found at: [http://adni.loni.usc.edu/wp-content/uploads/how\\_to\\_apply/ADNI\\_Acknowledgement\\_List.pdf](http://adni.loni.usc.edu/wp-content/uploads/how_to_apply/ADNI_Acknowledgement_List.pdf).

The ADNI was launched in 2003 as a public-private partnership, led by Principal Investigator Michael W. Weiner, MD. The primary goal of ADNI has been to test whether serial magnetic resonance imaging (MRI), positron emission tomography (PET), other biological markers, and clinical and neuropsychological assessment can be combined to measure the progression of mild cognitive impairment (MCI) and early Alzheimer's disease (AD). For up-to-date information, see <http://www.adni-info.org> (last accessed 15 March 2018). ADNI is a multi-center study with over 50 acquisition sites in North America. The first ADNI study, ADNI-1, was subsequently continued as ADNI-GO and ADNI-2, with a further continuation into ADNI-3 currently in progress. Throughout the three studies considered here more than 1500 participants were enrolled including healthy control subjects and subjects diagnosed with different stages of MCI or AD.

## Anatomical regions as defined in the NMM atlas

**Table 1.** Structure names of non-cortical structures in the NMM brain atlas. Original IDs were remapped to be consecutive.

| <b>non-cortical</b> structure                | abbreviation   | ID (right/left) |
|----------------------------------------------|----------------|-----------------|
| 3rd ventricle                                | 3rdVent        | 1               |
| 4th Ventricle                                | 4thVent        | 2               |
| Accumbens Area                               | AccA           | 3/4             |
| Amygdala                                     | Am             | 5/6             |
| Brain Stem                                   | BS             | 7               |
| Caudate                                      | Cau            | 8/9             |
| Cerebellum Exterior                          | CblmExt        | 10/11           |
| Cerebellum White Matter                      | CblmWM         | 12/13           |
| <i>Cerebral Exterior</i> <sup>excluded</sup> | <i>CrblExt</i> | <i>14/15</i>    |
| Cerebral White Matter                        | CrblWM         | 16/17           |
| Cerebrospinal Fluid                          | CSF            | 18              |
| Hippocampus                                  | Hc             | 19/20           |
| Inf. Lateral Ventricle                       | inflV          | 21/22           |
| Lateral Ventricle                            | LV             | 23/24           |
| Pallidum                                     | Pa             | 25/26           |
| Putamen                                      | Pu             | 27/28           |
| Thalamus Proper                              | Th             | 29/30           |
| Ventral DC                                   | vDC            | 31/32           |
| <i>Vessel</i> <sup>excluded</sup>            | <i>Vsl</i>     | <i>33/34</i>    |
| Optic Chiasm                                 | OptC           | 35              |
| Cerebellar Vermal Lobules I-V                | CVL1t5         | 36              |
| Cerebellar Vermal Lobules VI-VII             | CVL6t7         | 37              |
| Cerebellar Vermal Lobules VIII-X             | CVL8t10        | 38              |
| Basal Forebrain                              | BF             | 40/39           |

**Table 2.** Structure names of cortical structures in the NMM brain atlas.

| <b>cortical structure</b>                     | <b>abbreviation</b> | <b>ID (right/left)</b> |
|-----------------------------------------------|---------------------|------------------------|
| anterior cingulate gyrus                      | ACgG                | 41/42                  |
| anterior insula                               | AIns                | 43/44                  |
| anterior orbital gyrus                        | AOrG                | 45/46                  |
| angular gyrus                                 | AnG                 | 47/48                  |
| calcarine cortex                              | Calc                | 49/50                  |
| central operculum                             | CO                  | 51/52                  |
| cuneus                                        | Cun                 | 53/54                  |
| entorhinal area                               | EntA                | 55/56                  |
| frontal operculum                             | FO                  | 57/58                  |
| frontal pole                                  | FRP                 | 59/60                  |
| fusiform gyrus                                | FuG                 | 61/62                  |
| gyrus rectus                                  | GRe                 | 63/64                  |
| inferior occipital gyrus                      | IOG                 | 65/66                  |
| inferior temporal gyrus                       | ITG                 | 67/68                  |
| lingual gyrus                                 | LiG                 | 69/70                  |
| lateral orbital gyrus                         | LOrG                | 71/72                  |
| middle cingulate gyrus                        | MCgG                | 73/74                  |
| medial frontal cortex                         | MFC                 | 75/76                  |
| middle frontal gyrus                          | MFG                 | 77/78                  |
| middle occipital gyrus                        | MOG                 | 79/80                  |
| medial orbital gyrus                          | MOrG                | 81/82                  |
| postcentral gyrus medial segment              | MPoG                | 83/84                  |
| precentral gyrus medial segment               | MPrG                | 85/86                  |
| superior frontal gyrus medial segment         | MSFG                | 87/88                  |
| middle temporal gyrus                         | MTG                 | 89/90                  |
| occipital pole                                | OCP                 | 91/92                  |
| occipital fusiform gyrus                      | OFuG                | 93/94                  |
| opercular part of the inferior frontal gyrus  | OpIFG               | 95/96                  |
| orbital part of the inferior frontal gyrus    | OrIFG               | 97/98                  |
| posterior cingulate gyrus                     | PCgG                | 99/100                 |
| precuneus                                     | PCu                 | 101/102                |
| parahippocampal gyrus                         | PHG                 | 103/104                |
| posterior insula                              | PIns                | 105/106                |
| parietal operculum                            | PO                  | 107/108                |
| postcentral gyrus                             | PoG                 | 109/110                |
| posterior orbital gyrus                       | POrG                | 111/112                |
| planum polare                                 | PP                  | 113/114                |
| precentral gyrus                              | PrG                 | 115/116                |
| planum temporale                              | PT                  | 117/118                |
| subcallosal area                              | SCA                 | 119/120                |
| superior frontal gyrus                        | SFG                 | 121/122                |
| supplementary motor cortex                    | SMC                 | 123/124                |
| supramarginal gyrus                           | SMG                 | 125/126                |
| superior occipital gyrus                      | SOG                 | 127/128                |
| superior parietal lobule                      | SPL                 | 129/130                |
| superior temporal gyrus                       | STG                 | 131/132                |
| temporal pole                                 | TMP                 | 133/134                |
| triangular part of the inferior frontal gyrus | TrIFG               | 135/136                |
| transverse temporal gyrus                     | TTG                 | 137/138                |

## Cross-sectional analysis at baseline (AD vs. HC, uncorrected volumes)

**Table 3.** Classification results in % (6-fold CV, LDA 100 runs, RF/SVM 20 runs) for distinguishing between AD and HC. Significant group differences indicated by + ( $p < 0.05$ ) and ++ ( $p < 0.001$ ). Bonferroni-corrected significance in parentheses. Sorted by effect size.

| AD patients (N = 322, Positives <sup>P</sup> ) vs. Healthy Controls (N = 404, Negatives <sup>N</sup> ) (baseline analysis, uncorrected volumes) |            |      |      |                                           |                                           |                 |          |              |
|-------------------------------------------------------------------------------------------------------------------------------------------------|------------|------|------|-------------------------------------------|-------------------------------------------|-----------------|----------|--------------|
| structure                                                                                                                                       | ACC (bACC) | SENS | SPEC | mean (SD) [mm <sup>3</sup> ] <sup>P</sup> | mean (SD) [mm <sup>3</sup> ] <sup>N</sup> | effect size (d) | p-value  | sig. (corr.) |
| RandomForest (all features)                                                                                                                     | 85 (85)    | 81   | 88   |                                           |                                           |                 |          |              |
| SVM (all features)                                                                                                                              | 90 (90)    | 86   | 93   |                                           |                                           |                 |          |              |
| Gender (female = 0, male = 1)                                                                                                                   | 52 (52)    | 55   | 50   | 0.5 (0.5)                                 | 0.5 (0.5)                                 | 0.099           | 0.18349  | o (o)        |
| Age                                                                                                                                             | 51 (51)    | 51   | 51   | 75.1 (7.7)                                | 74.9 (5.7)                                | 0.027           | 0.71340  | o (o)        |
| <b>(surrogate structures)</b>                                                                                                                   |            |      |      |                                           |                                           |                 |          |              |
| Ventricles                                                                                                                                      | 66 (65)    | 55   | 75   | 63295.6 (28189.0)                         | 46227.4 (20971.9)                         | 0.698           | <0.00001 | ++ (++)      |
| CorticalGreyMatter                                                                                                                              | 61 (61)    | 62   | 60   | 491782.0 (56040.1)                        | 519904.6 (50579.3)                        | 0.530           | <0.00001 | ++ (++)      |
| BrainTissue                                                                                                                                     | 56 (56)    | 57   | 55   | 1133344.3 (118326.9)                      | 1163549.9 (110731.1)                      | 0.265           | 0.00042  | ++ (+)       |
| DeepGreyMatter                                                                                                                                  | 55 (55)    | 57   | 54   | 172879.2 (18868.2)                        | 175625.6 (16551.2)                        | 0.156           | 0.03725  | + (o)        |
| Brain                                                                                                                                           | 54 (55)    | 56   | 53   | 1199158.5 (132290.9)                      | 1212115.6 (118623.9)                      | 0.104           | 0.16526  | o (o)        |
| WhiteMatter                                                                                                                                     | 48 (47)    | 47   | 48   | 468683.1 (62373.7)                        | 468019.7 (60538.5)                        | 0.011           | 0.88497  | o (o)        |
| <b>(individual structures)</b>                                                                                                                  |            |      |      |                                           |                                           |                 |          |              |
| LeftHippocampus                                                                                                                                 | 76 (76)    | 76   | 75   | 2608.0 (479.7)                            | 3221.8 (434.3)                            | 1.349           | <0.00001 | ++ (++)      |
| Amygdala                                                                                                                                        | 75 (75)    | 73   | 78   | 1825.9 (388.6)                            | 2296.6 (314.5)                            | 1.348           | <0.00001 | ++ (++)      |
| Hippocampus                                                                                                                                     | 75 (75)    | 75   | 75   | 5429.2 (943.8)                            | 6601.4 (825.8)                            | 1.332           | <0.00001 | ++ (++)      |
| RightAmygdala                                                                                                                                   | 75 (75)    | 73   | 76   | 925.6 (209.5)                             | 1168.0 (171.6)                            | 1.280           | <0.00001 | ++ (++)      |
| EntA                                                                                                                                            | 73 (73)    | 71   | 75   | 3427.5 (675.5)                            | 4245.4 (609.2)                            | 1.279           | <0.00001 | ++ (++)      |
| LeftAmygdala                                                                                                                                    | 75 (75)    | 73   | 77   | 900.3 (205.1)                             | 1128.6 (162.7)                            | 1.250           | <0.00001 | ++ (++)      |
| RightHippocampus                                                                                                                                | 73 (73)    | 71   | 75   | 2821.2 (546.5)                            | 3379.6 (427.4)                            | 1.154           | <0.00001 | ++ (++)      |
| InflLatVent                                                                                                                                     | 73 (72)    | 58   | 85   | 3432.1 (1556.6)                           | 2107.1 (825.3)                            | 1.099           | <0.00001 | ++ (++)      |
| LeftInflLatVent                                                                                                                                 | 75 (74)    | 63   | 85   | 1652.9 (765.4)                            | 1006.8 (420.7)                            | 1.079           | <0.00001 | ++ (++)      |
| RightInflLatVent                                                                                                                                | 70 (68)    | 55   | 82   | 1779.3 (902.2)                            | 1100.3 (447.5)                            | 0.988           | <0.00001 | ++ (++)      |
| ITG                                                                                                                                             | 66 (66)    | 66   | 65   | 21776.6 (3325.8)                          | 24529.3 (2916.2)                          | 0.887           | <0.00001 | ++ (++)      |
| PHG                                                                                                                                             | 66 (66)    | 68   | 65   | 6447.4 (977.5)                            | 7217.3 (899.2)                            | 0.824           | <0.00001 | ++ (++)      |
| Ang                                                                                                                                             | 67 (67)    | 67   | 67   | 15077.5 (2580.5)                          | 17559.5 (2480.9)                          | 0.812           | <0.00001 | ++ (++)      |
| MTG                                                                                                                                             | 64 (64)    | 66   | 62   | 25677.9 (4030.6)                          | 28511.8 (3713.2)                          | 0.735           | <0.00001 | ++ (++)      |
| TMP                                                                                                                                             | 64 (63)    | 61   | 65   | 13730.4 (2468.4)                          | 15339.5 (2004.0)                          | 0.724           | <0.00001 | ++ (++)      |
| LateralVentricle                                                                                                                                | 65 (64)    | 55   | 73   | 55184.7 (26190.1)                         | 39883.0 (19481.1)                         | 0.674           | <0.00001 | ++ (++)      |
| LeftLateralVentricle                                                                                                                            | 66 (65)    | 55   | 75   | 29062.5 (14264.5)                         | 20827.4 (10483.3)                         | 0.669           | <0.00001 | ++ (++)      |
| SMG                                                                                                                                             | 62 (63)    | 64   | 61   | 13731.4 (2077.6)                          | 15086.0 (2006.8)                          | 0.664           | <0.00001 | ++ (++)      |
| RightLateralVentricle                                                                                                                           | 63 (62)    | 54   | 71   | 26122.3 (12557.2)                         | 19055.6 (9403.3)                          | 0.647           | <0.00001 | ++ (++)      |
| STG                                                                                                                                             | 63 (63)    | 62   | 63   | 12671.1 (2031.8)                          | 13889.0 (1933.7)                          | 0.616           | <0.00001 | ++ (++)      |
| OFuG                                                                                                                                            | 60 (60)    | 61   | 60   | 7382.1 (1324.3)                           | 8129.7 (1267.7)                           | 0.578           | <0.00001 | ++ (++)      |
| ThalamusProper                                                                                                                                  | 61 (61)    | 63   | 60   | 12486.4 (1477.5)                          | 13304.8 (1426.0)                          | 0.565           | <0.00001 | ++ (++)      |
| 3rdVentricle                                                                                                                                    | 60 (60)    | 54   | 65   | 2319.7 (828.7)                            | 1891.2 (721.5)                            | 0.556           | <0.00001 | ++ (++)      |
| BasalForebrain                                                                                                                                  | 62 (62)    | 64   | 60   | 795.6 (215.5)                             | 914.0 (213.2)                             | 0.552           | <0.00001 | ++ (++)      |
| FuG                                                                                                                                             | 60 (61)    | 63   | 59   | 15951.4 (2428.3)                          | 17131.2 (2281.3)                          | 0.503           | <0.00001 | ++ (++)      |
| Alns                                                                                                                                            | 62 (62)    | 63   | 60   | 8241.7 (1225.1)                           | 8820.0 (1142.4)                           | 0.490           | <0.00001 | ++ (++)      |
| AccumbensArea                                                                                                                                   | 60 (60)    | 57   | 62   | 617.0 (184.6)                             | 695.7 (148.3)                             | 0.475           | <0.00001 | ++ (++)      |
| MOG                                                                                                                                             | 59 (59)    | 61   | 57   | 10087.5 (1773.4)                          | 10837.5 (1524.1)                          | 0.457           | <0.00001 | ++ (++)      |
| IOG                                                                                                                                             | 58 (58)    | 57   | 59   | 11413.2 (2016.2)                          | 12233.2 (1815.4)                          | 0.430           | <0.00001 | ++ (++)      |
| SPL                                                                                                                                             | 58 (58)    | 59   | 57   | 16943.2 (2469.3)                          | 17977.7 (2441.6)                          | 0.422           | <0.00001 | ++ (++)      |
| Plns                                                                                                                                            | 58 (59)    | 60   | 57   | 4482.8 (701.8)                            | 4771.4 (703.1)                            | 0.411           | <0.00001 | ++ (++)      |
| PP                                                                                                                                              | 58 (58)    | 60   | 55   | 3682.5 (589.7)                            | 3912.8 (549.4)                            | 0.406           | <0.00001 | ++ (++)      |
| FO                                                                                                                                              | 57 (57)    | 58   | 55   | 3504.1 (549.2)                            | 3718.8 (539.9)                            | 0.395           | <0.00001 | ++ (++)      |
| MFG                                                                                                                                             | 59 (59)    | 60   | 59   | 33109.0 (5125.3)                          | 34968.2 (4791.0)                          | 0.376           | <0.00001 | ++ (++)      |
| SFG                                                                                                                                             | 56 (57)    | 58   | 55   | 26326.6 (3837.4)                          | 27676.8 (3441.8)                          | 0.373           | <0.00001 | ++ (++)      |
| PT                                                                                                                                              | 57 (57)    | 61   | 54   | 3658.7 (712.6)                            | 3926.4 (769.4)                            | 0.359           | <0.00001 | ++ (++)      |
| THFG                                                                                                                                            | 54 (54)    | 55   | 54   | 6113.5 (1082.3)                           | 6494.0 (1071.5)                           | 0.354           | <0.00001 | ++ (++)      |
| Caudate                                                                                                                                         | 58 (56)    | 43   | 69   | 7535.3 (2705.8)                           | 6812.7 (1705.2)                           | 0.328           | 0.00001  | ++ (+)       |
| Putamen                                                                                                                                         | 56 (56)    | 57   | 55   | 7455.9 (1342.8)                           | 7878.8 (1331.8)                           | 0.316           | 0.00003  | ++ (+)       |
| SCA                                                                                                                                             | 56 (57)    | 58   | 55   | 2367.0 (496.3)                            | 2510.7 (434.7)                            | 0.310           | 0.00004  | ++ (+)       |
| PCu                                                                                                                                             | 55 (56)    | 58   | 53   | 21742.5 (3583.1)                          | 22743.6 (3039.0)                          | 0.304           | 0.00005  | ++ (+)       |
| PCgG                                                                                                                                            | 56 (56)    | 57   | 55   | 8494.1 (1311.2)                           | 8862.3 (1128.5)                           | 0.304           | 0.00005  | ++ (+)       |
| CSF                                                                                                                                             | 57 (56)    | 51   | 61   | 2419.4 (579.6)                            | 2250.7 (598.6)                            | 0.286           | 0.00014  | ++ (+)       |
| POrG                                                                                                                                            | 55 (55)    | 57   | 54   | 6068.4 (927.5)                            | 6312.4 (859.2)                            | 0.274           | 0.00026  | ++ (+)       |
| MCgG                                                                                                                                            | 55 (54)    | 48   | 60   | 10326.7 (1674.5)                          | 9905.0 (1511.3)                           | 0.266           | 0.00040  | ++ (+)       |
| MSFG                                                                                                                                            | 56 (57)    | 61   | 53   | 12685.2 (2000.5)                          | 13151.5 (1735.4)                          | 0.251           | 0.00082  | ++ (+)       |
| SOG                                                                                                                                             | 55 (55)    | 57   | 54   | 7063.8 (1242.6)                           | 7354.8 (1136.5)                           | 0.246           | 0.00106  | + (o)        |
| MFC                                                                                                                                             | 54 (54)    | 54   | 54   | 3510.2 (716.9)                            | 3663.4 (603.6)                            | 0.233           | 0.00185  | + (o)        |
| OCF                                                                                                                                             | 53 (53)    | 57   | 50   | 4494.6 (931.2)                            | 4728.0 (1076.0)                           | 0.230           | 0.00215  | + (o)        |
| CerebellarVermallobules-V                                                                                                                       | 54 (54)    | 56   | 52   | 4464.0 (672.4)                            | 4616.9 (672.9)                            | 0.227           | 0.00244  | + (o)        |
| OrIFG                                                                                                                                           | 55 (55)    | 60   | 50   | 2749.4 (587.8)                            | 2879.5 (568.2)                            | 0.225           | 0.00263  | + (o)        |
| LOrG                                                                                                                                            | 54 (55)    | 57   | 52   | 3713.5 (688.9)                            | 3853.3 (600.1)                            | 0.218           | 0.00363  | + (o)        |
| OpIFG                                                                                                                                           | 52 (53)    | 57   | 49   | 5649.2 (1036.1)                           | 5864.9 (1065.5)                           | 0.205           | 0.00624  | + (o)        |
| GRc                                                                                                                                             | 53 (53)    | 55   | 52   | 3228.0 (549.0)                            | 3335.1 (512.8)                            | 0.202           | 0.00691  | + (o)        |
| PO                                                                                                                                              | 54 (55)    | 58   | 52   | 4251.3 (792.1)                            | 4409.9 (796.3)                            | 0.200           | 0.00770  | + (o)        |
| CerebellumWhiteMatter                                                                                                                           | 54 (52)    | 40   | 65   | 32795.7 (8328.0)                          | 31344.3 (7506.8)                          | 0.184           | 0.01393  | + (o)        |
| SMC                                                                                                                                             | 53 (53)    | 57   | 49   | 10285.9 (1713.6)                          | 10567.8 (1418.9)                          | 0.181           | 0.01558  | + (o)        |
| AOrG                                                                                                                                            | 51 (51)    | 52   | 50   | 3804.7 (617.0)                            | 3906.9 (598.1)                            | 0.168           | 0.02448  | + (o)        |
| TTG                                                                                                                                             | 56 (57)    | 62   | 52   | 2387.0 (557.6)                            | 2477.1 (532.0)                            | 0.166           | 0.02684  | + (o)        |
| CerebellarVermallobulesVI-VII                                                                                                                   | 53 (53)    | 50   | 55   | 2417.3 (432.6)                            | 2355.7 (390.0)                            | 0.150           | 0.04435  | + (o)        |
| POg                                                                                                                                             | 53 (53)    | 55   | 51   | 18093.5 (2551.3)                          | 18449.6 (2321.8)                          | 0.147           | 0.04984  | + (o)        |
| MPOg                                                                                                                                            | 54 (54)    | 56   | 52   | 1644.7 (394.0)                            | 1699.2 (370.6)                            | 0.143           | 0.05604  | o (o)        |
| PrG                                                                                                                                             | 52 (52)    | 53   | 51   | 23676.0 (3462.6)                          | 24096.7 (3052.7)                          | 0.130           | 0.08268  | o (o)        |
| CO                                                                                                                                              | 53 (53)    | 55   | 51   | 7785.8 (1114.5)                           | 7923.9 (1090.1)                           | 0.125           | 0.09374  | o (o)        |
| Calc                                                                                                                                            | 53 (53)    | 50   | 55   | 7085.9 (1722.2)                           | 6884.2 (1531.2)                           | 0.125           | 0.09586  | o (o)        |
| FRP                                                                                                                                             | 51 (52)    | 53   | 50   | 5444.2 (1113.1)                           | 5565.8 (996.7)                            | 0.116           | 0.12123  | o (o)        |
| MPrG                                                                                                                                            | 53 (53)    | 55   | 51   | 5428.2 (957.0)                            | 5531.1 (847.0)                            | 0.115           | 0.12515  | o (o)        |
| MOrG                                                                                                                                            | 52 (52)    | 54   | 51   | 8243.5 (1150.7)                           | 8361.5 (1010.3)                           | 0.110           | 0.14236  | o (o)        |
| ACg                                                                                                                                             | 51 (51)    | 54   | 49   | 8487.7 (1576.8)                           | 8613.8 (1458.5)                           | 0.083           | 0.26466  | o (o)        |
| VentralDC                                                                                                                                       | 51 (51)    | 52   | 50   | 8448.8 (965.4)                            | 8523.1 (931.8)                            | 0.079           | 0.29369  | o (o)        |
| BrainStem                                                                                                                                       | 50 (50)    | 52   | 49   | 18742.3 (2233.9)                          | 18885.5 (2141.8)                          | 0.066           | 0.38005  | o (o)        |
| Pallidum                                                                                                                                        | 51 (51)    | 49   | 52   | 2668.2 (454.5)                            | 2645.4 (394.7)                            | 0.054           | 0.47061  | o (o)        |
| Cun                                                                                                                                             | 49 (49)    | 49   | 48   | 10691.9 (2079.7)                          | 10753.0 (1794.8)                          | 0.032           | 0.67110  | o (o)        |
| CerebellarVermallobulesVIII-X                                                                                                                   | 48 (48)    | 47   | 49   | 2823.6 (474.2)                            | 2814.5 (428.5)                            | 0.020           | 0.78685  | o (o)        |
| 4thVentricle                                                                                                                                    | 48 (48)    | 45   | 51   | 2359.0 (691.3)                            | 2346.0 (690.8)                            | 0.019           | 0.80132  | o (o)        |
| CerebralWhiteMatter                                                                                                                             | 48 (48)    | 49   | 48   | 435887.4 (58972.0)                        | 436675.4 (56880.4)                        | 0.014           | 0.85528  | o (o)        |
| CerebellumExterior                                                                                                                              | 48 (48)    | 48   | 49   | 97168.8 (12890.5)                         | 97279.6 (11515.4)                         | 0.009           | 0.90128  | o (o)        |
| LiG                                                                                                                                             | 48 (48)    | 47   | 48   | 18512.9 (2794.7)                          | 18524.4 (2476.3)                          | 0.004           | 0.95334  | o (o)        |

## Cross-sectional analysis at baseline (AD vs. HC, corrected volumes)

**Table 4.** Classification results in % (6-fold CV, LDA 100 runs, RF/SVM 20 runs) for distinguishing between AD and HC. Significant group differences indicated by + ( $p < 0.05$ ) and ++ ( $p < 0.001$ ). Bonferroni-corrected significance in parentheses. Sorted by effect size. Mean also shown in % with respect to sample-specific reference volume used for feature correction.

| AD patients (N = 322, Positives <sup>P</sup> ) vs. Healthy Controls (N = 404, Negatives <sup>N</sup> ) (baseline analysis, <sup>1</sup> volumes corrected for age/gender/brain size) |            |      |      |                                                          |                                             |                 |          |              |         |
|--------------------------------------------------------------------------------------------------------------------------------------------------------------------------------------|------------|------|------|----------------------------------------------------------|---------------------------------------------|-----------------|----------|--------------|---------|
| structure                                                                                                                                                                            | ACC (bACC) | SENS | SPEC | mean [rel. to HC] (SD) [mm <sup>3</sup> ] <sup>P,T</sup> | mean (SD) [mm <sup>3</sup> ] <sup>N,T</sup> | effect size (d) | p-value  | sig. (corr.) |         |
| RandomForest (all features)                                                                                                                                                          | 87 (86)    | 83   | 90   |                                                          |                                             |                 |          |              |         |
| SVM (all features)                                                                                                                                                                   | 90 (89)    | 86   | 92   |                                                          |                                             |                 |          |              |         |
| Gender (female = 0, male = 1)                                                                                                                                                        | 52 (52)    | 55   | 50   | 0.5 (0.5)                                                | 0.5 (0.5)                                   | 0.099           | 0.18349  |              | o (o)   |
| Age                                                                                                                                                                                  | 50 (50)    | 50   | 50   | 75.1 (7.7)                                               | 74.9 (5.7)                                  | 0.027           | 0.71340  |              | o (o)   |
| (surrogate structures)                                                                                                                                                               |            |      |      |                                                          |                                             |                 |          |              |         |
| BrainTissue                                                                                                                                                                          | 72 (71)    | 63   | 78   | -17942.8 [± 1.5%] (22718.7)                              | 0 (17403.6)                                 | 0.900           | <0.00001 |              | ++ (++) |
| CorticalGreyMatter                                                                                                                                                                   | 68 (67)    | 63   | 72   | -23635.9 [± 4.6%] (28907.3)                              | 0 (24078.1)                                 | 0.898           | <0.00001 |              | ++ (++) |
| Ventricles                                                                                                                                                                           | 72 (71)    | 63   | 79   | 17757.3 [± 46.2%] (22639.6)                              | 0 (17293.9)                                 | 0.895           | <0.00001 |              | ++ (++) |
| WhiteMatter                                                                                                                                                                          | 57 (56)    | 51   | 61   | 7242.2 [± 1.7%] (29309.8)                                | 0 (28686.1)                                 | 0.250           | 0.00086  |              | ++ (o)  |
| DeepGreyMatter                                                                                                                                                                       | 52 (52)    | 50   | 54   | -1549.1 [± -0.9%] (13310.2)                              | 0 (11142.2)                                 | 0.127           | 0.08834  |              | o (o)   |
| Brain                                                                                                                                                                                | 54 (55)    | 56   | 53   | 1199158.5 (132290.9)                                     | 1212115.6 (118623.9)                        | 0.104           | 0.16526  |              | o (o)   |
| (individual structures)                                                                                                                                                              |            |      |      |                                                          |                                             |                 |          |              |         |
| Amygdala                                                                                                                                                                             | 80 (80)    | 76   | 84   | -452.0 [± -20.0%] (332.0)                                | 0 (250.5)                                   | 1.561           | <0.00001 |              | ++ (++) |
| Hippocampus                                                                                                                                                                          | 78 (78)    | 75   | 80   | -1115.4 [± -17.0%] (817.7)                               | 0 (660.7)                                   | 1.519           | <0.00001 |              | ++ (++) |
| EntA                                                                                                                                                                                 | 78 (78)    | 76   | 80   | -801.3 [± -19.0%] (583.3)                                | 0 (485.3)                                   | 1.509           | <0.00001 |              | ++ (++) |
| LeftHippocampus                                                                                                                                                                      | 79 (78)    | 76   | 81   | -588.1 [± -18.4%] (423.1)                                | 0 (364.6)                                   | 1.502           | <0.00001 |              | ++ (++) |
| RightAmygdala                                                                                                                                                                        | 80 (80)    | 77   | 83   | -232.2 [± -20.2%] (182.6)                                | 0 (139.4)                                   | 1.452           | <0.00001 |              | ++ (++) |
| LeftAmygdala                                                                                                                                                                         | 78 (78)    | 75   | 81   | -219.8 [± -19.7%] (179.7)                                | 0 (135.5)                                   | 1.403           | <0.00001 |              | ++ (++) |
| RightHippocampus                                                                                                                                                                     | 76 (75)    | 71   | 79   | -527.3 [± -15.7%] (488.0)                                | 0 (239.1)                                   | 1.280           | <0.00001 |              | ++ (++) |
| InfLatVent                                                                                                                                                                           | 78 (77)    | 65   | 89   | 1330.8 [± 65.8%] (1367.4)                                | 0 (702.2)                                   | 1.267           | <0.00001 |              | ++ (++) |
| LeftInfLatVent                                                                                                                                                                       | 77 (76)    | 66   | 86   | 649.5 [± 68.2%] (677.1)                                  | 0 (360.6)                                   | 1.237           | <0.00001 |              | ++ (++) |
| ITG                                                                                                                                                                                  | 71 (71)    | 69   | 73   | -2588.0 [± -10.7%] (2506.9)                              | 0 (1954.5)                                  | 1.168           | <0.00001 |              | ++ (++) |
| RightInfLatVent                                                                                                                                                                      | 75 (73)    | 59   | 87   | 681.3 [± 63.6%] (814.9)                                  | 0 (391.3)                                   | 1.106           | <0.00001 |              | ++ (++) |
| PHG                                                                                                                                                                                  | 68 (68)    | 64   | 72   | -739.8 [± -10.3%] (832.6)                                | 0 (702.4)                                   | 0.970           | <0.00001 |              | ++ (++) |
| MTG                                                                                                                                                                                  | 69 (69)    | 69   | 70   | -2534.0 [± -9.0%] (2853.0)                               | 0 (2411.3)                                  | 0.969           | <0.00001 |              | ++ (++) |
| AnG                                                                                                                                                                                  | 68 (67)    | 65   | 70   | -1880.5 [± -10.6%] (2345.6)                              | 0 (1973.2)                                  | 0.876           | <0.00001 |              | ++ (++) |
| TMP                                                                                                                                                                                  | 66 (65)    | 64   | 67   | -1521.7 [± -10.1%] (1967.2)                              | 0 (1539.3)                                  | 0.873           | <0.00001 |              | ++ (++) |
| LateralVentricle                                                                                                                                                                     | 71 (70)    | 62   | 78   | 15972.2 [± 50.3%] (21196.2)                              | 0 (16214.4)                                 | 0.859           | <0.00001 |              | ++ (++) |
| LeftLateralVentricle                                                                                                                                                                 | 70 (69)    | 61   | 79   | 8584.7 [± 51.4%] (11586.9)                               | 0 (8816.1)                                  | 0.847           | <0.00001 |              | ++ (++) |
| RightLateralVentricle                                                                                                                                                                | 70 (69)    | 59   | 78   | 7387.5 [± 49.6%] (10387.1)                               | 0 (7883.2)                                  | 0.814           | <0.00001 |              | ++ (++) |
| STG                                                                                                                                                                                  | 65 (65)    | 64   | 66   | -1100.3 [± -7.9%] (1610.7)                               | 0 (1478.6)                                  | 0.715           | <0.00001 |              | ++ (++) |
| 3rdVentricle                                                                                                                                                                         | 67 (66)    | 63   | 70   | 434.3 [± 27.9%] (699.9)                                  | 0 (591.1)                                   | 0.677           | <0.00001 |              | ++ (++) |
| SMG                                                                                                                                                                                  | 64 (64)    | 63   | 65   | -1196.5 [± -7.8%] (2003.1)                               | 0 (1697.8)                                  | 0.650           | <0.00001 |              | ++ (++) |
| ThalamusProper                                                                                                                                                                       | 63 (63)    | 61   | 65   | -680.6 [± -5.0%] (1214.1)                                | 0 (1005.2)                                  | 0.617           | <0.00001 |              | ++ (++) |
| FuG                                                                                                                                                                                  | 62 (62)    | 62   | 61   | -1072.1 [± -6.4%] (1750.6)                               | 0 (1769.3)                                  | 0.609           | <0.00001 |              | ++ (++) |
| OFuG                                                                                                                                                                                 | 60 (60)    | 58   | 62   | -690.7 [± -8.4%] (1225.8)                                | 0 (1061.2)                                  | 0.607           | <0.00001 |              | ++ (++) |
| BasalForebrain                                                                                                                                                                       | 63 (63)    | 66   | 61   | -109.6 [± -12.0%] (195.4)                                | 0 (189.3)                                   | 0.571           | <0.00001 |              | ++ (++) |
| AIms                                                                                                                                                                                 | 59 (60)    | 62   | 58   | -509.3 [± -5.8%] (995.9)                                 | 0 (915.4)                                   | 0.535           | <0.00001 |              | ++ (++) |
| MOG                                                                                                                                                                                  | 60 (60)    | 61   | 59   | -643.3 [± -6.1%] (1375.1)                                | 0 (1195.7)                                  | 0.503           | <0.00001 |              | ++ (++) |
| IOG                                                                                                                                                                                  | 59 (59)    | 60   | 59   | -697.2 [± -5.8%] (1571.8)                                | 0 (1386.2)                                  | 0.474           | <0.00001 |              | ++ (++) |
| AccumbensArea                                                                                                                                                                        | 60 (60)    | 59   | 61   | -71.7 [± -10.3%] (177.2)                                 | 0 (138.5)                                   | 0.457           | <0.00001 |              | ++ (++) |
| PP                                                                                                                                                                                   | 58 (58)    | 61   | 56   | -200.0 [± -5.2%] (464.5)                                 | 0 (433.4)                                   | 0.447           | <0.00001 |              | ++ (++) |
| MCgG                                                                                                                                                                                 | 58 (57)    | 54   | 60   | 544.3 [± 5.6%] (1270.6)                                  | 0 (1190.1)                                  | 0.444           | <0.00001 |              | ++ (++) |
| Pms                                                                                                                                                                                  | 58 (58)    | 58   | 58   | -231.1 [± -4.9%] (524.6)                                 | 0 (547.9)                                   | 0.430           | <0.00001 |              | ++ (++) |
| MFG                                                                                                                                                                                  | 58 (58)    | 56   | 60   | -1467.9 [± -4.2%] (3689.2)                               | 0 (3194.1)                                  | 0.429           | <0.00001 |              | ++ (++) |
| SPL                                                                                                                                                                                  | 56 (56)    | 57   | 56   | -867.5 [± -4.7%] (2175.8)                                | 0 (1972.5)                                  | 0.420           | <0.00001 |              | ++ (++) |
| SFG                                                                                                                                                                                  | 59 (59)    | 60   | 58   | -1124.3 [± -4.1%] (3032.2)                               | 0 (2632.7)                                  | 0.399           | <0.00001 |              | ++ (++) |
| Caudate                                                                                                                                                                              | 58 (57)    | 46   | 68   | 799.5 [± 11.2%] (2447.8)                                 | 0 (1597.5)                                  | 0.396           | <0.00001 |              | ++ (++) |
| FO                                                                                                                                                                                   | 60 (60)    | 59   | 60   | -187.3 [± -4.9%] (506.5)                                 | 0 (458.7)                                   | 0.390           | <0.00001 |              | ++ (++) |
| PT                                                                                                                                                                                   | 56 (56)    | 58   | 55   | -232.4 [± -5.8%] (590.0)                                 | 0 (636.4)                                   | 0.377           | <0.00001 |              | ++ (++) |
| TrIFG                                                                                                                                                                                | 57 (57)    | 56   | 58   | -331.8 [± -5.0%] (985.1)                                 | 0 (933.4)                                   | 0.347           | <0.00001 |              | ++ (++) |
| PCu                                                                                                                                                                                  | 56 (56)    | 57   | 54   | -788.1 [± -3.6%] (2502.1)                                | 0 (2124.3)                                  | 0.343           | <0.00001 |              | ++ (++) |
| PCgG                                                                                                                                                                                 | 57 (57)    | 59   | 56   | -306.1 [± -3.7%] (960.5)                                 | 0 (898.4)                                   | 0.330           | 0.00001  |              | ++ (++) |
| SCA                                                                                                                                                                                  | 58 (58)    | 58   | 59   | -124.5 [± -5.1%] (441.7)                                 | 0 (388.6)                                   | 0.301           | 0.00006  |              | ++ (+)  |
| POrG                                                                                                                                                                                 | 57 (57)    | 54   | 59   | -211.0 [± -3.4%] (738.1)                                 | 0 (685.9)                                   | 0.297           | 0.00008  |              | ++ (+)  |
| CSF                                                                                                                                                                                  | 58 (58)    | 53   | 62   | 172.5 [± 9.3%] (621.2)                                   | 0 (545.8)                                   | 0.297           | 0.00008  |              | ++ (+)  |
| Putamen                                                                                                                                                                              | 57 (57)    | 58   | 56   | -367.5 [± -4.6%] (1300.2)                                | 0 (1243.1)                                  | 0.290           | 0.00012  |              | ++ (+)  |
| MSPG                                                                                                                                                                                 | 54 (54)    | 55   | 53   | -349.9 [± -2.8%] (1447.4)                                | 0 (1334.5)                                  | 0.253           | 0.00076  |              | ++ (o)  |
| MFC                                                                                                                                                                                  | 53 (53)    | 54   | 53   | -123.9 [± -3.6%] (577.8)                                 | 0 (493.6)                                   | 0.233           | 0.00192  |              | ++ (o)  |
| CerebellumWhiteMatter                                                                                                                                                                | 55 (54)    | 44   | 64   | 1677.9 [± 5.8%] (7982.2)                                 | 0 (6947.8)                                  | 0.226           | 0.00257  |              | + (o)   |
| OCP                                                                                                                                                                                  | 53 (54)    | 57   | 50   | -207.2 [± -4.5%] (815.9)                                 | 0 (999.5)                                   | 0.225           | 0.00274  |              | + (o)   |
| SOG                                                                                                                                                                                  | 55 (56)    | 58   | 53   | -220.0 [± -3.1%] (1044.7)                                | 0 (974.8)                                   | 0.219           | 0.00354  |              | + (o)   |
| CerebralWhiteMatter                                                                                                                                                                  | 56 (55)    | 52   | 58   | 5564.3 [± 1.4%] (26392.1)                                | 0 (25736.3)                                 | 0.214           | 0.00434  |              | + (o)   |
| OrIFG                                                                                                                                                                                | 55 (56)    | 59   | 52   | -109.5 [± -3.9%] (518.0)                                 | 0 (510.3)                                   | 0.213           | 0.00446  |              | + (o)   |
| LOrG                                                                                                                                                                                 | 52 (52)    | 53   | 51   | -111.8 [± -3.0%] (565.6)                                 | 0 (492.2)                                   | 0.213           | 0.00456  |              | + (o)   |
| CerebellarVermalLobules-V                                                                                                                                                            | 56 (56)    | 57   | 55   | -128.8 [± -2.8%] (620.1)                                 | 0 (632.2)                                   | 0.205           | 0.00610  |              | + (o)   |
| Cale                                                                                                                                                                                 | 53 (53)    | 51   | 55   | 275.0 [± 3.8%] (1536.7)                                  | 0 (1432.9)                                  | 0.186           | 0.01309  |              | + (o)   |
| CerebellarVermalLobulesVI-VII                                                                                                                                                        | 54 (54)    | 52   | 55   | 71.0 [± 3.0%] (401.3)                                    | 0 (370.4)                                   | 0.185           | 0.01368  |              | + (o)   |
| OpIFG                                                                                                                                                                                | 51 (51)    | 53   | 50   | -153.5 [± -2.5%] (890.2)                                 | 0 (909.9)                                   | 0.170           | 0.02290  |              | + (o)   |
| GRr                                                                                                                                                                                  | 52 (52)    | 54   | 51   | -77.1 [± -2.5%] (463.7)                                  | 0 (463.0)                                   | 0.166           | 0.02614  |              | + (o)   |
| SMC                                                                                                                                                                                  | 52 (52)    | 54   | 51   | -192.1 [± -2.0%] (1309.9)                                | 0 (1108.0)                                  | 0.160           | 0.03273  |              | + (o)   |
| PO                                                                                                                                                                                   | 53 (53)    | 54   | 52   | -105.0 [± -2.1%] (682.3)                                 | 0 (637.7)                                   | 0.160           | 0.03303  |              | + (o)   |
| AOOrG                                                                                                                                                                                | 52 (52)    | 52   | 52   | -71.6 [± -1.8%] (483.0)                                  | 0 (464.7)                                   | 0.151           | 0.04301  |              | + (o)   |
| TTG                                                                                                                                                                                  | 54 (54)    | 56   | 53   | -70.4 [± -2.7%] (481.9)                                  | 0 (455.3)                                   | 0.151           | 0.04398  |              | + (o)   |
| MPoG                                                                                                                                                                                 | 53 (53)    | 53   | 53   | -44.8 [± -2.5%] (377.8)                                  | 0 (348.2)                                   | 0.124           | 0.09769  |              | + (o)   |
| PrG                                                                                                                                                                                  | 52 (53)    | 55   | 50   | -262.1 [± -1.1%] (2723.4)                                | 0 (2472.1)                                  | 0.101           | 0.17534  |              | o (o)   |
| Pallidum                                                                                                                                                                             | 54 (54)    | 55   | 53   | 38.0 [± 1.4%] (418.7)                                    | 0 (362.0)                                   | 0.098           | 0.19090  |              | o (o)   |
| PoG                                                                                                                                                                                  | 52 (52)    | 52   | 52   | -189.2 [± -1.0%] (2124.4)                                | 0 (1913.6)                                  | 0.094           | 0.20803  |              | o (o)   |
| FRP                                                                                                                                                                                  | 50 (50)    | 53   | 47   | -76.0 [± -1.5%] (962.3)                                  | 0 (901.5)                                   | 0.082           | 0.27406  |              | o (o)   |
| MPgG                                                                                                                                                                                 | 51 (51)    | 53   | 50   | -58.2 [± -1.1%] (819.9)                                  | 0 (747.4)                                   | 0.075           | 0.31847  |              | o (o)   |
| CO                                                                                                                                                                                   | 50 (50)    | 51   | 49   | -58.3 [± -0.7%] (783.8)                                  | 0 (796.8)                                   | 0.074           | 0.32384  |              | o (o)   |
| MOOrG                                                                                                                                                                                | 51 (51)    | 53   | 49   | -61.3 [± -0.7%] (943.0)                                  | 0 (819.7)                                   | 0.070           | 0.34945  |              | o (o)   |
| CerebellarVermalLobulesVIII-X                                                                                                                                                        | 51 (51)    | 51   | 51   | 22.1 [± 0.8%] (423.1)                                    | 0 (375.1)                                   | 0.056           | 0.45705  |              | o (o)   |
| LiG                                                                                                                                                                                  | 51 (51)    | 51   | 51   | 106.4 [± 0.5%] (2022.0)                                  | 0 (1846.7)                                  | 0.055           | 0.46010  |              | o (o)   |
| CerebellumExterior                                                                                                                                                                   | 52 (52)    | 52   | 51   | 442.1 [± 0.4%] (10408.6)                                 | 0 (8931.0)                                  | 0.046           | 0.53842  |              | o (o)   |
| 4thVentricle                                                                                                                                                                         | 50 (50)    | 46   | 54   | 19.9 [± 1.1%] (646.4)                                    | 0 (643.3)                                   | 0.031           | 0.67923  |              | o (o)   |
| Cun                                                                                                                                                                                  | 48 (48)    | 46   | 49   | 33.2 [± 0.2%] (1619.0)                                   | 0 (1403.3)                                  | 0.022           | 0.76765  |              | o (o)   |
| VentralDC                                                                                                                                                                            | 47 (47)    | 46   | 47   | -13.7 [± -0.0%] (709.3)                                  | 0 (597.0)                                   | 0.021           | 0.77728  |              | o (o)   |
| BrainStem                                                                                                                                                                            | 48 (48)    | 47   | 48   | 17.8 [± 0.2%] (1574.8)                                   | 0 (1484.5)                                  | 0.012           | 0.87624  |              | o (o)   |
| ACg                                                                                                                                                                                  | 47 (47)    | 47   | 48   | -5.9 [± -0.0%] (1178.5)                                  | 0 (1101.8)                                  | 0.005           | 0.94417  |              | o (o)   |

## Cross-sectional analysis at baseline (pMCI vs. sMCI, corrected volumes)

**Table 5.** Classification results in % (6-fold CV, LDA 100 runs, RF/SVM 20 runs) for distinguishing between pMCI and sMCI. Significant group differences indicated by + ( $p < 0.05$ ) and ++ ( $p < 0.001$ ). Bonferroni-corrected significance in parentheses. Sorted by effect size. Mean also shown in % with respect to sample-specific reference volume used for feature correction.

| progressive MCI (N = 177, Positives <sup>P</sup> ) vs. stable MCI (N = 166, Negatives <sup>N</sup> ) (baseline analysis, <sup>†</sup> volumes corrected for age/gender/brain size) |            |      |      |                                                          |                                                          |                 |          |      |         |
|------------------------------------------------------------------------------------------------------------------------------------------------------------------------------------|------------|------|------|----------------------------------------------------------|----------------------------------------------------------|-----------------|----------|------|---------|
| structure                                                                                                                                                                          | ACC (bACC) | SENS | SPEC | mean [rel. to HC] (SD) [mm <sup>3</sup> ] <sup>P,†</sup> | mean [rel. to HC] (SD) [mm <sup>3</sup> ] <sup>N,†</sup> | effect size (d) | p-value  | sig. | (corr.) |
| RandomForest (all features)                                                                                                                                                        | 68 (68)    | 72   | 64   |                                                          |                                                          |                 |          |      |         |
| SVM (all features)                                                                                                                                                                 | 67 (67)    | 70   | 64   |                                                          |                                                          |                 |          |      |         |
| Age                                                                                                                                                                                | 47 (47)    | 45   | 48   | 73.5 (7.6)                                               | 73.8 (7.6)                                               | 0.029           | 0.78516  |      | o (o)   |
| Gender (female = 0, male = 1)                                                                                                                                                      | 45 (45)    | 45   | 45   | 0.6 (0.5)                                                | 0.6 (0.5)                                                | 0.006           | 0.95829  |      | o (o)   |
| <b>(surrogate structures)</b>                                                                                                                                                      |            |      |      |                                                          |                                                          |                 |          |      |         |
| BrainTissue                                                                                                                                                                        | 60 (60)    | 51   | 69   | -12652.2 [± -1.1%] (20144.6)                             | -4372.1 [± -0.4%] (20741.3)                              | 0.405           | 0.00021  |      | ++ (+)  |
| Ventricles                                                                                                                                                                         | 60 (60)    | 51   | 70   | 12483.5 [± 35.6%] (20085.3)                              | 4427.7 [± 9.7%] (20676.8)                                | 0.396           | 0.00029  |      | ++ (+)  |
| CorticalGreyMatter                                                                                                                                                                 | 56 (56)    | 55   | 56   | -16743.9 [± -3.2%] (27348.8)                             | -6929.4 [± -1.3%] (26948.6)                              | 0.361           | 0.00091  |      | ++ (o)  |
| Brain                                                                                                                                                                              | 51 (51)    | 52   | 49   | 1222424.9 (131084.2)                                     | 1238635.5 (118830.2)                                     | 0.129           | 0.23200  |      | o (o)   |
| WhiteMatter                                                                                                                                                                        | 48 (48)    | 47   | 49   | 5966.3 [± 1.3%] (27919.1)                                | 4607.3 [± 1.0%] (26735.5)                                | 0.050           | 0.64592  |      | o (o)   |
| DeepGreyMatter                                                                                                                                                                     | 47 (47)    | 46   | 48   | -1874.6 [± -1.0%] (11838.0)                              | -2050.0 [± -1.1%] (11988.8)                              | 0.015           | 0.89167  |      | o (o)   |
| <b>(individual structures)</b>                                                                                                                                                     |            |      |      |                                                          |                                                          |                 |          |      |         |
| Amygdala                                                                                                                                                                           | 65 (65)    | 63   | 68   | -387.4 [± -16.5%] (308.7)                                | -149.4 [± -6.4%] (352.2)                                 | 0.720           | <0.00001 |      | ++ (++) |
| LeftAmygdala                                                                                                                                                                       | 62 (62)    | 61   | 64   | -191.6 [± -16.7%] (161.2)                                | -70.4 [± -6.0%] (189.7)                                  | 0.690           | <0.00001 |      | ++ (++) |
| InflLatVent                                                                                                                                                                        | 64 (64)    | 54   | 74   | 1034.0 [± 53.8%] (1097.9)                                | 358.6 [± 17.4%] (903.1)                                  | 0.670           | <0.00001 |      | ++ (++) |
| LeftInflLatVent                                                                                                                                                                    | 65 (65)    | 56   | 75   | 480.0 [± 53.9%] (538.2)                                  | 156.3 [± 15.8%] (451.1)                                  | 0.650           | <0.00001 |      | ++ (++) |
| RightAmygdala                                                                                                                                                                      | 65 (65)    | 63   | 67   | -195.8 [± -16.4%] (176.7)                                | -79.0 [± -6.7%] (184.1)                                  | 0.648           | <0.00001 |      | ++ (++) |
| EntA                                                                                                                                                                               | 61 (61)    | 61   | 60   | -678.3 [± -15.6%] (565.7)                                | -294.0 [± -6.7%] (622.8)                                 | 0.647           | <0.00001 |      | ++ (++) |
| RightInflLatVent                                                                                                                                                                   | 64 (64)    | 54   | 74   | 554.0 [± 53.9%] (689.1)                                  | 202.3 [± 18.9%] (527.5)                                  | 0.571           | <0.00001 |      | ++ (++) |
| Hippocampus                                                                                                                                                                        | 61 (61)    | 63   | 60   | -1042.8 [± -15.6%] (817.1)                               | -604.7 [± -8.9%] (786.1)                                 | 0.546           | <0.00001 |      | ++ (++) |
| RightHippocampus                                                                                                                                                                   | 63 (63)    | 61   | 64   | -514.7 [± -15.1%] (442.9)                                | -287.7 [± -8.3%] (408.3)                                 | 0.532           | <0.00001 |      | ++ (++) |
| MTG                                                                                                                                                                                | 60 (60)    | 59   | 60   | -2305.3 [± -7.9%] (2698.1)                               | -925.8 [± -3.0%] (2708.9)                                | 0.510           | <0.00001 |      | ++ (++) |
| ANg                                                                                                                                                                                | 60 (60)    | 61   | 59   | -1579.0 [± -8.9%] (2223.0)                               | -495.7 [± -2.6%] (2084.0)                                | 0.502           | <0.00001 |      | ++ (++) |
| LeftHippocampus                                                                                                                                                                    | 61 (61)    | 62   | 60   | -528.1 [± -16.2%] (429.6)                                | -317.0 [± -9.6%] (425.8)                                 | 0.493           | <0.00001 |      | ++ (++) |
| CSF                                                                                                                                                                                | 59 (59)    | 54   | 64   | 156.4 [± 7.6%] (533.9)                                   | -61.6 [± -2.2%] (491.3)                                  | 0.424           | 0.00010  |      | ++ (+)  |
| 3rdVentricle                                                                                                                                                                       | 59 (59)    | 55   | 64   | 376.2 [± 24.3%] (661.3)                                  | 113.9 [± 6.1%] (639.9)                                   | 0.403           | 0.00023  |      | ++ (+)  |
| LateralVentricle                                                                                                                                                                   | 60 (61)    | 51   | 70   | 11080.2 [± 40.1%] (18700.0)                              | 3986.3 [± 10.1%] (19536.4)                               | 0.371           | 0.00066  |      | ++ (o)  |
| RightLateralVentricle                                                                                                                                                              | 60 (60)    | 51   | 69   | 5078.1 [± 38.4%] (9151.1)                                | 1656.3 [± 9.1%] (9510.1)                                 | 0.367           | 0.00077  |      | ++ (o)  |
| LeftLateralVentricle                                                                                                                                                               | 59 (59)    | 51   | 68   | 6002.1 [± 41.6%] (10336.4)                               | 2330.0 [± 11.1%] (10722.7)                               | 0.349           | 0.00136  |      | ++ (o)  |
| STG                                                                                                                                                                                | 57 (57)    | 57   | 56   | -1048.8 [± -7.4%] (1509.9)                               | -513.8 [± -3.4%] (1583.2)                                | 0.346           | 0.00149  |      | ++ (o)  |
| ITG                                                                                                                                                                                | 57 (57)    | 57   | 56   | -1510.5 [± -6.1%] (2300.7)                               | -691.2 [± -2.8%] (2482.3)                                | 0.343           | 0.00165  |      | ++ (o)  |
| TMP                                                                                                                                                                                | 58 (58)    | 58   | 58   | -875.3 [± -5.7%] (1703.2)                                | -310.1 [± -1.9%] (1766.7)                                | 0.326           | 0.00275  |      | ++ (o)  |
| MCg                                                                                                                                                                                | 55 (55)    | 50   | 60   | 472.7 [± 4.6%] (1159.1)                                  | 78.4 [± 0.7%] (1292.7)                                   | 0.322           | 0.00311  |      | ++ (o)  |
| BasalForebrain                                                                                                                                                                     | 57 (57)    | 57   | 57   | -108.9 [± -11.4%] (190.9)                                | -45.6 [± -4.7%] (207.0)                                  | 0.318           | 0.00346  |      | ++ (o)  |
| IUG                                                                                                                                                                                | 56 (56)    | 59   | 52   | -466.0 [± -3.9%] (1583.2)                                | 17.9 [± -0.0%] (1546.6)                                  | 0.309           | 0.00449  |      | ++ (o)  |
| FuG                                                                                                                                                                                | 56 (56)    | 57   | 55   | -776.1 [± -4.5%] (1755.3)                                | -257.5 [± -1.5%] (1632.4)                                | 0.306           | 0.00495  |      | ++ (o)  |
| MOG                                                                                                                                                                                | 58 (58)    | 59   | 56   | -445.8 [± -4.3%] (1531.4)                                | -25.6 [± -0.3%] (1245.4)                                 | 0.300           | 0.00579  |      | ++ (o)  |
| OFuG                                                                                                                                                                               | 56 (56)    | 55   | 57   | -415.3 [± -4.9%] (1153.0)                                | -57.9 [± -0.6%] (1242.7)                                 | 0.299           | 0.00604  |      | ++ (o)  |
| AccumbensArea                                                                                                                                                                      | 59 (59)    | 55   | 63   | -66.5 [± -9.6%] (162.8)                                  | -24.3 [± -3.4%] (137.4)                                  | 0.279           | 0.01012  |      | ++ (o)  |
| ThalamusProper                                                                                                                                                                     | 56 (55)    | 57   | 54   | -650.7 [± -4.8%] (1342.2)                                | -310.3 [± -2.3%] (1187.7)                                | 0.268           | 0.01356  |      | ++ (o)  |
| Putamen                                                                                                                                                                            | 59 (59)    | 59   | 60   | -356.0 [± -4.5%] (1372.3)                                | -28.0 [± -0.4%] (1071.7)                                 | 0.265           | 0.01454  |      | ++ (o)  |
| SMG                                                                                                                                                                                | 53 (53)    | 53   | 53   | -880.2 [± -5.8%] (1933.5)                                | -376.0 [± -2.4%] (1924.4)                                | 0.261           | 0.01608  |      | ++ (o)  |
| OHFG                                                                                                                                                                               | 58 (58)    | 60   | 55   | -111.1 [± -3.6%] (518.9)                                 | 16.4 [± 0.6%] (489.0)                                    | 0.253           | 0.01998  |      | ++ (o)  |
| Plns                                                                                                                                                                               | 58 (58)    | 59   | 57   | -216.3 [± -4.6%] (569.6)                                 | -82.3 [± -1.6%] (486.6)                                  | 0.252           | 0.02010  |      | ++ (o)  |
| Alms                                                                                                                                                                               | 56 (55)    | 60   | 51   | -403.2 [± -4.5%] (892.4)                                 | -175.9 [± -1.9%] (937.7)                                 | 0.248           | 0.02206  |      | ++ (o)  |
| FO                                                                                                                                                                                 | 58 (58)    | 61   | 54   | -189.9 [± -5.0%] (473.2)                                 | -73.5 [± -1.9%] (468.1)                                  | 0.247           | 0.02266  |      | ++ (o)  |
| FRP                                                                                                                                                                                | 55 (55)    | 55   | 55   | -178.4 [± -3.2%] (995.6)                                 | 58.1 [± 0.9%] (978.8)                                    | 0.239           | 0.02731  |      | ++ (o)  |
| PCgG                                                                                                                                                                               | 53 (53)    | 57   | 50   | -176.8 [± -2.1%] (851.6)                                 | 35.2 [± 0.3%] (947.5)                                    | 0.236           | 0.02984  |      | ++ (o)  |
| SFG                                                                                                                                                                                | 51 (51)    | 50   | 53   | -891.9 [± -3.1%] (2741.4)                                | -274.6 [± -0.9%] (2842.4)                                | 0.221           | 0.04139  |      | ++ (o)  |
| MSFG                                                                                                                                                                               | 55 (55)    | 54   | 56   | -383.6 [± -3.0%] (1538.4)                                | -69.4 [± -0.6%] (1404.0)                                 | 0.213           | 0.04948  |      | ++ (o)  |
| PO                                                                                                                                                                                 | 58 (58)    | 58   | 57   | -150.2 [± -3.2%] (668.2)                                 | -12.6 [± -0.2%] (636.3)                                  | 0.211           | 0.05185  |      | ++ (o)  |
| PrG                                                                                                                                                                                | 53 (53)    | 51   | 54   | 327.2 [± 1.2%] (3003.8)                                  | -269.9 [± -1.1%] (2644.4)                                | 0.211           | 0.05213  |      | ++ (o)  |
| SPL                                                                                                                                                                                | 55 (55)    | 57   | 53   | -513.7 [± -2.8%] (2105.3)                                | -91.4 [± -0.4%] (1985.5)                                 | 0.206           | 0.05715  |      | ++ (o)  |
| PCu                                                                                                                                                                                | 55 (55)    | 54   | 57   | -543.4 [± -2.4%] (2447.9)                                | -80.3 [± -0.4%] (2204.2)                                 | 0.198           | 0.06707  |      | ++ (o)  |
| PHG                                                                                                                                                                                | 56 (56)    | 56   | 55   | -553.9 [± -7.5%] (799.3)                                 | -403.9 [± -5.4%] (766.7)                                 | 0.191           | 0.07742  |      | ++ (o)  |
| Calc                                                                                                                                                                               | 53 (54)    | 48   | 59   | 313.9 [± 4.5%] (1471.6)                                  | 72.0 [± 0.7%] (1551.3)                                   | 0.160           | 0.13935  |      | o (o)   |
| MFG                                                                                                                                                                                | 49 (49)    | 51   | 47   | -1109.3 [± -3.1%] (3500.4)                               | -578.0 [± -1.6%] (3119.2)                                | 0.160           | 0.13961  |      | o (o)   |
| SMC                                                                                                                                                                                | 53 (53)    | 52   | 53   | -71.7 [± -0.8%] (1254.1)                                 | -267.8 [± -2.4%] (1219.8)                                | 0.158           | 0.14334  |      | o (o)   |
| Caudate                                                                                                                                                                            | 51 (51)    | 39   | 63   | 490.3 [± 7.0%] (2016.4)                                  | 172.7 [± 2.3%] (2103.6)                                  | 0.154           | 0.15432  |      | o (o)   |
| CerebellarVermalLobules-VI-VII                                                                                                                                                     | 53 (54)    | 49   | 58   | 82.9 [± 2.7%] (350.8)                                    | 6.4 [± 0.3%] (396.3)                                     | 0.151           | 0.16198  |      | o (o)   |
| BrainStem                                                                                                                                                                          | 50 (51)    | 49   | 52   | 35.3 [± 0.2%] (1656.3)                                   | -201.8 [± -1.1%] (1493.6)                                | 0.150           | 0.16584  |      | o (o)   |
| ThFG                                                                                                                                                                               | 53 (53)    | 54   | 51   | -328.1 [± -4.9%] (972.6)                                 | -183.2 [± -2.8%] (958.8)                                 | 0.150           | 0.16586  |      | o (o)   |
| GrE                                                                                                                                                                                | 54 (54)    | 57   | 51   | -40.2 [± -1.3%] (484.7)                                  | 31.6 [± 0.9%] (507.6)                                    | 0.145           | 0.18101  |      | o (o)   |
| PP                                                                                                                                                                                 | 54 (54)    | 56   | 53   | -209.2 [± -5.2%] (444.7)                                 | -153.5 [± -3.7%] (405.8)                                 | 0.131           | 0.22693  |      | o (o)   |
| MPG                                                                                                                                                                                | 49 (49)    | 47   | 50   | 141.9 [± 2.4%] (981.1)                                   | 32.8 [± 0.4%] (760.2)                                    | 0.124           | 0.25265  |      | o (o)   |
| VentralDC                                                                                                                                                                          | 53 (53)    | 52   | 53   | -55.7 [± -0.6%] (672.9)                                  | -132.9 [± -1.5%] (624.4)                                 | 0.119           | 0.27208  |      | o (o)   |
| OCp                                                                                                                                                                                | 52 (52)    | 53   | 51   | 25.5 [± 0.3%] (1055.1)                                   | 136.3 [± 2.6%] (908.3)                                   | 0.112           | 0.29959  |      | o (o)   |
| SCA                                                                                                                                                                                | 50 (50)    | 51   | 49   | -90.4 [± -3.6%] (407.2)                                  | -46.3 [± -1.9%] (381.1)                                  | 0.112           | 0.30165  |      | o (o)   |
| PT                                                                                                                                                                                 | 55 (55)    | 55   | 54   | -274.9 [± -6.7%] (635.1)                                 | -208.9 [± -4.9%] (575.4)                                 | 0.109           | 0.31490  |      | o (o)   |
| ACg                                                                                                                                                                                | 51 (51)    | 52   | 50   | -161.8 [± -1.9%] (1157.0)                                | -40.5 [± -0.4%] (1133.5)                                 | 0.106           | 0.32780  |      | o (o)   |
| CerebellumExterior                                                                                                                                                                 | 53 (53)    | 50   | 56   | 271.9 [± 0.3%] (9093.7)                                  | -695.3 [± -0.7%] (9828.3)                                | 0.102           | 0.34449  |      | o (o)   |
| OpIFG                                                                                                                                                                              | 52 (52)    | 50   | 54   | -164.8 [± -2.5%] (946.5)                                 | -74.3 [± -0.9%] (994.5)                                  | 0.093           | 0.38867  |      | o (o)   |
| LORG                                                                                                                                                                               | 49 (49)    | 48   | 49   | -94.9 [± -2.2%] (526.9)                                  | -46.4 [± -1.0%] (610.2)                                  | 0.085           | 0.43046  |      | o (o)   |
| SOG                                                                                                                                                                                | 52 (51)    | 54   | 49   | -30.6 [± -0.4%] (1105.4)                                 | 51.4 [± 0.6%] (890.3)                                    | 0.081           | 0.45156  |      | o (o)   |
| MPoG                                                                                                                                                                               | 50 (50)    | 49   | 51   | -50.0 [± -2.9%] (374.9)                                  | -74.2 [± -4.1%] (365.0)                                  | 0.066           | 0.54466  |      | o (o)   |
| POg                                                                                                                                                                                | 51 (51)    | 54   | 49   | -127.2 [± -2.0%] (678.0)                                 | -85.1 [± -1.3%] (691.7)                                  | 0.061           | 0.56966  |      | o (o)   |
| PuG                                                                                                                                                                                | 52 (52)    | 52   | 52   | 225.5 [± 1.1%] (2211.5)                                  | 100.1 [± 0.5%] (1992.6)                                  | 0.059           | 0.58233  |      | o (o)   |
| CerebellarVermalLobules-V                                                                                                                                                          | 49 (49)    | 50   | 48   | -88.1 [± -2.0%] (588.0)                                  | -56.4 [± -1.3%] (617.9)                                  | 0.053           | 0.62643  |      | o (o)   |
| CerebellumWhiteMatter                                                                                                                                                              | 49 (49)    | 42   | 56   | 1633.9 [± 5.2%] (8349.6)                                 | 1274.0 [± 3.8%] (6934.3)                                 | 0.047           | 0.66544  |      | o (o)   |
| LIG                                                                                                                                                                                | 49 (49)    | 49   | 49   | 26.2 [± 0.2%] (2037.7)                                   | -61.0 [± -0.2%] (2098.3)                                 | 0.042           | 0.69632  |      | o (o)   |
| CerebralWhiteMatter                                                                                                                                                                | 46 (46)    | 47   | 46   | 4332.4 [± 1.0%] (25782.2)                                | 3333.3 [± 0.8%] (25445.0)                                | 0.039           | 0.71838  |      | o (o)   |
| 4thVentricle                                                                                                                                                                       | 48 (48)    | 45   | 52   | -6.9 [± 0.3%] (571.0)                                    | -31.1 [± -0.9%] (681.2)                                  | 0.039           | 0.72152  |      | o (o)   |
| TTG                                                                                                                                                                                | 46 (46)    | 47   | 45   | -48.6 [± -1.7%] (506.4)                                  | -36.1 [± -1.3%] (443.2)                                  | 0.026           | 0.80827  |      | o (o)   |
| MFC                                                                                                                                                                                | 48 (48)    | 49   | 46   | -145.6 [± -3.9%] (598.9)                                 | -131.3 [± -3.6%] (575.9)                                 | 0.024           | 0.82244  |      | o (o)   |
| Pallidum                                                                                                                                                                           | 47 (47)    | 48   | 47   | 9.3 [± 0.2%] (383.8)                                     | 7.4 [± 0.0%] (364.6)                                     | 0.018           | 0.86516  |      | o (o)   |
| Cun                                                                                                                                                                                | 47 (47)    | 46   | 48   | 129.0 [± 1.2%] (1484.4)                                  | 102.5 [± 1.0%] (1449.4)                                  | 0.018           | 0.86737  |      | o (o)   |
| MOrg                                                                                                                                                                               | 46 (46)    | 47   | 45   | 4.1 [± 0.0%] (835.1)                                     | -8.5 [± -0.1%] (900.9)                                   | 0.015           | 0.89268  |      | o (o)   |
| CO                                                                                                                                                                                 | 46 (46)    | 46   | 46   | -96.2 [± -1.2%] (783.1)                                  | -107.0 [± -1.3%] (830.1)                                 | 0.013           | 0.90184  |      | o (o)   |
| CerebellarVermalLobules-VIII-X                                                                                                                                                     | 46 (46)    | 47   | 45   | 11.7 [± 0.5%] (406.8)                                    | 17.1 [± 0.6%] (421.7)                                    | 0.013           | 0.90479  |      | o (o)   |
| AORG                                                                                                                                                                               | 46 (46)    | 46   | 46   | -73.3 [± -1.9%] (451.4)                                  | -78.7 [± -1.9%] (502.9)                                  | 0.011           | 0.91793  |      | o (o)   |

## Longitudinal analysis (baseline→m12, AD vs. HC)

**Table 6.** Classification results in % (6-fold CV, LDA 100 runs, RF/SVM 20 runs) for distinguishing between AD and HC. Significant group differences indicated by + ( $p < 0.05$ ) and ++ ( $p < 0.001$ ). Bonferroni-corrected significance in parentheses. Sorted by effect size.

| AD patients (N = 195, Positives <sup>P</sup> ) vs. Healthy Controls (N = 290, Negatives <sup>N</sup> ) (longitudinal analysis, bl→m12) |            |      |      |                            |                            |                 |          |              |
|----------------------------------------------------------------------------------------------------------------------------------------|------------|------|------|----------------------------|----------------------------|-----------------|----------|--------------|
| structure                                                                                                                              | ACC (bACC) | SENS | SPEC | mean (SD) [%] <sup>P</sup> | mean (SD) [%] <sup>N</sup> | effect size (d) | p-value  | sig. (corr.) |
| RandomForest (all features)                                                                                                            | 85 (84)    | 78   | 90   |                            |                            |                 |          |              |
| SVM (all features)                                                                                                                     | 84 (82)    | 71   | 93   |                            |                            |                 |          |              |
| Age                                                                                                                                    | 54 (54)    | 53   | 54   | 75.3 (7.7)                 | 74.8 (5.6)                 | 0.072           | 0.43678  | o (o)        |
| Gender (female = 0, male = 1)                                                                                                          | 48 (48)    | 50   | 46   | 0.5 (0.5)                  | 0.5 (0.5)                  | 0.042           | 0.64808  | o (o)        |
| (surrogate structures)                                                                                                                 |            |      |      |                            |                            |                 |          |              |
| Ventricles                                                                                                                             | 75 (74)    | 64   | 83   | 7.2 (4.6)                  | 2.8 (3.0)                  | 1.202           | <0.00001 | ++(++)       |
| BrainTissue                                                                                                                            | 70 (70)    | 67   | 72   | -1.3 (1.1)                 | -0.5 (0.8)                 | 0.862           | <0.00001 | ++(++)       |
| WhiteMatter                                                                                                                            | 73 (73)    | 68   | 77   | -0.8 (1.0)                 | -0.2 (0.7)                 | 0.736           | <0.00001 | ++(++)       |
| CorticalGreyMatter                                                                                                                     | 65 (64)    | 62   | 67   | -1.9 (2.3)                 | -0.8 (1.4)                 | 0.585           | <0.00001 | ++(++)       |
| Brain                                                                                                                                  | 64 (64)    | 63   | 65   | -0.9 (1.0)                 | -0.4 (0.7)                 | 0.574           | <0.00001 | ++(++)       |
| DeepGreyMatter                                                                                                                         | 66 (64)    | 57   | 71   | -1.4 (1.7)                 | -0.8 (1.3)                 | 0.455           | <0.00001 | ++(++)       |
| (individual structures)                                                                                                                |            |      |      |                            |                            |                 |          |              |
| Hippocampus                                                                                                                            | 80 (78)    | 67   | 88   | -4.8 (3.7)                 | -1.1 (1.7)                 | 1.400           | <0.00001 | ++(++)       |
| InfLatVent                                                                                                                             | 79 (77)    | 69   | 86   | 7.5 (5.5)                  | 1.8 (3.3)                  | 1.334           | <0.00001 | ++(++)       |
| LeftHippocampus                                                                                                                        | 80 (78)    | 70   | 87   | -4.9 (4.2)                 | -1.1 (1.7)                 | 1.287           | <0.00001 | ++(++)       |
| MTG                                                                                                                                    | 76 (74)    | 67   | 82   | -3.8 (2.8)                 | -1.1 (1.5)                 | 1.274           | <0.00001 | ++(++)       |
| RightInfLatVent                                                                                                                        | 77 (75)    | 65   | 84   | 7.4 (6.4)                  | 1.8 (3.3)                  | 1.185           | <0.00001 | ++(++)       |
| RightLateralVentricle                                                                                                                  | 75 (73)    | 63   | 83   | 7.5 (5.1)                  | 2.8 (3.1)                  | 1.170           | <0.00001 | ++(++)       |
| LeftInfLatVent                                                                                                                         | 78 (76)    | 70   | 83   | 7.5 (5.8)                  | 1.7 (4.4)                  | 1.166           | <0.00001 | ++(++)       |
| LateralVentricle                                                                                                                       | 74 (72)    | 62   | 83   | 7.6 (4.9)                  | 3.0 (3.2)                  | 1.160           | <0.00001 | ++(++)       |
| RightHippocampus                                                                                                                       | 78 (75)    | 62   | 89   | -4.8 (4.5)                 | -1.1 (2.1)                 | 1.138           | <0.00001 | ++(++)       |
| LeftLateralVentricle                                                                                                                   | 74 (72)    | 63   | 81   | 7.6 (4.9)                  | 3.1 (3.4)                  | 1.085           | <0.00001 | ++(++)       |
| PP                                                                                                                                     | 77 (76)    | 70   | 81   | -6.7 (5.5)                 | -2.0 (3.5)                 | 1.075           | <0.00001 | ++(++)       |
| CerebralWhiteMatter                                                                                                                    | 76 (74)    | 67   | 82   | -0.9 (0.9)                 | -0.2 (0.6)                 | 0.914           | <0.00001 | ++(++)       |
| PT                                                                                                                                     | 70 (69)    | 62   | 76   | -5.8 (5.3)                 | -2.1 (3.1)                 | 0.898           | <0.00001 | ++(++)       |
| ITG                                                                                                                                    | 72 (71)    | 67   | 75   | -2.7 (2.7)                 | -1.0 (1.3)                 | 0.866           | <0.00001 | ++(++)       |
| FuG                                                                                                                                    | 69 (68)    | 63   | 73   | -1.7 (1.7)                 | -0.5 (1.1)                 | 0.852           | <0.00001 | ++(++)       |
| Amygdala                                                                                                                               | 76 (74)    | 66   | 83   | -3.3 (5.0)                 | -0.5 (2.0)                 | 0.787           | <0.00001 | ++(++)       |
| EntA                                                                                                                                   | 69 (69)    | 65   | 72   | -3.7 (4.1)                 | -1.2 (2.8)                 | 0.747           | <0.00001 | ++(++)       |
| TMP                                                                                                                                    | 72 (71)    | 67   | 74   | -4.3 (4.6)                 | -1.8 (2.8)                 | 0.700           | <0.00001 | ++(++)       |
| LeftAmygdala                                                                                                                           | 73 (70)    | 58   | 82   | -3.6 (6.2)                 | -0.5 (2.5)                 | 0.699           | <0.00001 | ++(++)       |
| SMG                                                                                                                                    | 64 (64)    | 61   | 67   | -2.9 (3.5)                 | -1.1 (2.1)                 | 0.674           | <0.00001 | ++(++)       |
| RightAmygdala                                                                                                                          | 74 (73)    | 67   | 79   | -3.3 (6.1)                 | -0.5 (2.5)                 | 0.631           | <0.00001 | ++(++)       |
| TTG                                                                                                                                    | 67 (66)    | 62   | 70   | -4.6 (5.3)                 | -1.9 (3.6)                 | 0.604           | <0.00001 | ++(++)       |
| AnG                                                                                                                                    | 63 (62)    | 58   | 66   | -2.6 (3.7)                 | -0.9 (2.2)                 | 0.598           | <0.00001 | ++(++)       |
| AIns                                                                                                                                   | 65 (64)    | 59   | 68   | -2.0 (2.7)                 | -0.7 (1.9)                 | 0.562           | <0.00001 | ++(++)       |
| MSFG                                                                                                                                   | 60 (59)    | 57   | 61   | -2.4 (3.4)                 | -0.7 (2.6)                 | 0.551           | <0.00001 | ++(++)       |
| PHG                                                                                                                                    | 61 (60)    | 57   | 63   | -1.7 (2.5)                 | -0.6 (1.8)                 | 0.521           | <0.00001 | ++(++)       |
| Caudate                                                                                                                                | 64 (63)    | 60   | 67   | -4.7 (5.6)                 | -2.3 (3.7)                 | 0.512           | <0.00001 | ++(++)       |
| IOG                                                                                                                                    | 64 (63)    | 58   | 69   | -2.2 (3.4)                 | -0.9 (2.2)                 | 0.442           | <0.00001 | ++(++)       |
| SMC                                                                                                                                    | 60 (60)    | 58   | 62   | -1.9 (3.2)                 | -0.7 (2.5)                 | 0.434           | <0.00001 | ++(++)       |
| 3rdVentricle                                                                                                                           | 63 (62)    | 57   | 67   | 4.1 (4.4)                  | 2.4 (3.6)                  | 0.427           | <0.00001 | ++(++)       |
| OrIFG                                                                                                                                  | 60 (60)    | 59   | 62   | -2.8 (3.7)                 | -1.3 (3.6)                 | 0.425           | <0.00001 | ++(++)       |
| FO                                                                                                                                     | 58 (58)    | 54   | 61   | -1.9 (3.8)                 | -0.6 (2.3)                 | 0.406           | 0.00001  | ++(++)       |
| PCu                                                                                                                                    | 60 (60)    | 59   | 60   | -1.2 (3.1)                 | -0.2 (2.0)                 | 0.395           | 0.00002  | ++(++)       |
| PCgG                                                                                                                                   | 57 (56)    | 53   | 59   | -0.8 (1.9)                 | -0.1 (1.7)                 | 0.385           | 0.00004  | ++(++)       |
| MFG                                                                                                                                    | 60 (60)    | 61   | 59   | -2.0 (3.8)                 | -0.9 (2.1)                 | 0.384           | 0.00004  | ++(++)       |
| ACg                                                                                                                                    | 60 (60)    | 58   | 62   | -1.6 (3.4)                 | -0.5 (2.3)                 | 0.384           | 0.00004  | ++(++)       |
| SFG                                                                                                                                    | 59 (59)    | 57   | 61   | -2.1 (4.1)                 | -0.9 (2.4)                 | 0.354           | 0.00015  | ++(++)       |
| MORg                                                                                                                                   | 59 (58)    | 54   | 62   | -1.9 (4.5)                 | -0.6 (3.0)                 | 0.352           | 0.00016  | ++(++)       |
| TrIFG                                                                                                                                  | 60 (59)    | 56   | 62   | -2.4 (3.6)                 | -1.4 (2.5)                 | 0.348           | 0.00019  | ++(++)       |
| ThalamusProper                                                                                                                         | 72 (71)    | 63   | 79   | -2.2 (2.3)                 | -1.1 (3.9)                 | 0.331           | 0.00038  | ++(++)       |
| BrainStem                                                                                                                              | 55 (53)    | 45   | 61   | -0.9 (1.3)                 | -0.6 (0.9)                 | 0.310           | 0.00089  | ++(o)        |
| MFC                                                                                                                                    | 60 (60)    | 57   | 63   | -1.8 (4.5)                 | -0.6 (3.4)                 | 0.303           | 0.00116  | +(o)         |
| MOG                                                                                                                                    | 58 (58)    | 56   | 60   | -1.7 (4.1)                 | -0.7 (2.6)                 | 0.299           | 0.00133  | +(o)         |
| 4thVentricle                                                                                                                           | 58 (57)    | 51   | 62   | 2.4 (6.2)                  | 0.9 (4.5)                  | 0.295           | 0.00152  | +(o)         |
| CSF                                                                                                                                    | 56 (55)    | 54   | 57   | 1.1 (3.7)                  | 0.1 (3.2)                  | 0.289           | 0.00192  | +(o)         |
| OFuG                                                                                                                                   | 55 (55)    | 53   | 56   | -1.0 (3.3)                 | -0.2 (2.5)                 | 0.277           | 0.00294  | +(o)         |
| SPL                                                                                                                                    | 60 (59)    | 58   | 60   | -2.0 (4.0)                 | -1.0 (3.0)                 | 0.274           | 0.00320  | +(o)         |
| OptIFG                                                                                                                                 | 56 (56)    | 54   | 58   | -2.1 (4.4)                 | -1.2 (2.8)                 | 0.270           | 0.00369  | +(o)         |
| POrG                                                                                                                                   | 56 (56)    | 56   | 56   | -1.3 (3.3)                 | -0.6 (2.4)                 | 0.236           | 0.01130  | +(o)         |
| CerebellumExterior                                                                                                                     | 60 (58)    | 49   | 68   | -1.3 (2.6)                 | -0.8 (2.1)                 | 0.229           | 0.01382  | +(o)         |
| MPrG                                                                                                                                   | 55 (54)    | 53   | 56   | -1.0 (3.9)                 | -0.3 (3.2)                 | 0.194           | 0.03708  | +(o)         |
| LOrG                                                                                                                                   | 56 (56)    | 55   | 57   | -2.7 (4.8)                 | -1.7 (5.1)                 | 0.192           | 0.03847  | +(o)         |
| SOG                                                                                                                                    | 58 (57)    | 56   | 59   | -1.6 (4.6)                 | -0.8 (3.5)                 | 0.187           | 0.04441  | +(o)         |
| SCA                                                                                                                                    | 58 (58)    | 59   | 57   | -2.6 (10.0)                | -1.3 (4.5)                 | 0.176           | 0.05788  | o(o)         |
| LiG                                                                                                                                    | 55 (56)    | 60   | 52   | -0.3 (1.9)                 | -0.0 (1.6)                 | 0.175           | 0.05999  | o(o)         |
| PrG                                                                                                                                    | 55 (55)    | 55   | 55   | -1.4 (4.1)                 | -0.8 (2.9)                 | 0.167           | 0.07119  | o(o)         |
| MCgG                                                                                                                                   | 54 (54)    | 55   | 54   | -0.5 (2.6)                 | -0.1 (2.5)                 | 0.158           | 0.08770  | o(o)         |
| Plns                                                                                                                                   | 55 (54)    | 50   | 58   | -1.4 (3.4)                 | -1.0 (2.5)                 | 0.148           | 0.11160  | o(o)         |
| Pallidum                                                                                                                               | 58 (52)    | 21   | 83   | 0.3 (2.9)                  | -0.1 (2.2)                 | 0.141           | 0.12864  | o(o)         |
| FRP                                                                                                                                    | 58 (57)    | 51   | 62   | -3.9 (15.3)                | -2.3 (14.0)                | 0.111           | 0.23076  | o(o)         |
| AccumbensArea                                                                                                                          | 56 (49)    | 13   | 85   | 3.0 (50.3)                 | -0.5 (7.0)                 | 0.109           | 0.23774  | o(o)         |
| VentralDC                                                                                                                              | 53 (53)    | 54   | 53   | -0.7 (2.0)                 | -0.5 (1.6)                 | 0.107           | 0.24813  | o(o)         |
| GRe                                                                                                                                    | 56 (56)    | 55   | 57   | -2.1 (6.7)                 | -1.5 (7.0)                 | 0.097           | 0.29359  | o(o)         |
| CerebellarVermalLobulesVIII-X                                                                                                          | 54 (53)    | 52   | 55   | -0.6 (2.8)                 | -0.4 (2.0)                 | 0.096           | 0.30009  | o(o)         |
| PO                                                                                                                                     | 52 (52)    | 53   | 51   | -0.1 (3.9)                 | -0.4 (2.7)                 | 0.089           | 0.33509  | o(o)         |
| Cun                                                                                                                                    | 50 (51)    | 53   | 48   | -0.3 (3.5)                 | -0.6 (3.9)                 | 0.087           | 0.34872  | o(o)         |
| AORg                                                                                                                                   | 53 (52)    | 49   | 55   | -1.5 (5.1)                 | -1.1 (3.8)                 | 0.086           | 0.35288  | o(o)         |
| CerebellarVermalLobulesI-V                                                                                                             | 49 (49)    | 47   | 51   | -0.5 (2.5)                 | -0.3 (1.8)                 | 0.083           | 0.37161  | o(o)         |
| OCp                                                                                                                                    | 53 (51)    | 46   | 57   | -3.1 (10.4)                | -2.2 (11.5)                | 0.081           | 0.38148  | o(o)         |
| Putamen                                                                                                                                | 54 (49)    | 28   | 71   | -0.1 (1.4)                 | -0.0 (0.8)                 | 0.075           | 0.41924  | o(o)         |
| MPoG                                                                                                                                   | 50 (50)    | 50   | 50   | -0.9 (8.4)                 | -0.5 (5.0)                 | 0.057           | 0.54043  | o(o)         |
| BasalForebrain                                                                                                                         | 51 (50)    | 47   | 53   | -2.1 (12.9)                | -1.6 (9.1)                 | 0.046           | 0.62158  | o(o)         |
| PoG                                                                                                                                    | 50 (50)    | 52   | 49   | -1.1 (4.8)                 | -0.9 (3.3)                 | 0.045           | 0.62950  | o(o)         |
| CerebellumWhiteMatter                                                                                                                  | 53 (50)    | 31   | 68   | 0.6 (7.2)                  | 0.4 (5.3)                  | 0.036           | 0.69917  | o(o)         |
| CerebellarVermalLobulesVI-VII                                                                                                          | 49 (48)    | 47   | 50   | 0.2 (4.3)                  | 0.1 (3.7)                  | 0.029           | 0.75272  | o(o)         |
| CO                                                                                                                                     | 48 (48)    | 47   | 48   | -0.5 (3.7)                 | -0.6 (2.6)                 | 0.025           | 0.78620  | o(o)         |
| Cale                                                                                                                                   | 48 (47)    | 45   | 50   | -0.1 (3.5)                 | -0.2 (3.1)                 | 0.019           | 0.83368  | o(o)         |
| STG                                                                                                                                    | 48 (48)    | 46   | 50   | -0.6 (2.6)                 | -0.6 (1.8)                 | 0.010           | 0.91377  | o(o)         |

## Longitudinal analysis (baseline→m12, pMCI vs. sMCI)

**Table 7.** Classification results in % (6-fold CV, LDA 100 runs, RF/SVM 20 runs) for distinguishing between pMCI and sMCI. Significant group differences indicated by + ( $p < 0.05$ ) and ++ ( $p < 0.001$ ). Bonferroni-corrected significance in parentheses. Sorted by effect size.

| progressive MCI (N = 168, Positives <sup>P</sup> ) vs. stable MCI (N = 149, Negatives <sup>N</sup> ) (longitudinal analysis, bl→m12) |            |      |      |                            |                            |                 |          |              |
|--------------------------------------------------------------------------------------------------------------------------------------|------------|------|------|----------------------------|----------------------------|-----------------|----------|--------------|
| structure                                                                                                                            | ACC (bACC) | SENS | SPEC | mean (SD) [%] <sup>P</sup> | mean (SD) [%] <sup>N</sup> | effect size (d) | p-value  | sig. (corr.) |
| RandomForest (all features)                                                                                                          | 74 (73)    | 77   | 70   |                            |                            |                 |          |              |
| SVM (all features)                                                                                                                   | 74 (74)    | 72   | 75   |                            |                            |                 |          |              |
| Age                                                                                                                                  | 49 (49)    | 46   | 51   | 73.6 (7.6)                 | 74.0 (7.4)                 | 0.050           | 0.65912  | o (o)        |
| Gender (female = 0, male = 1)                                                                                                        | 45 (45)    | 45   | 45   | 0.6 (0.5)                  | 0.6 (0.5)                  | 0.001           | 0.99199  | o (o)        |
| (surrogate structures)                                                                                                               |            |      |      |                            |                            |                 |          |              |
| Ventricles                                                                                                                           | 68 (69)    | 63   | 74   | 6.8 (4.3)                  | 3.4 (3.1)                  | 0.890           | <0.00001 | ++(++)       |
| BrainTissue                                                                                                                          | 63 (63)    | 64   | 63   | -1.2 (1.0)                 | -0.6 (0.8)                 | 0.652           | <0.00001 | ++(++)       |
| CorticalGreyMatter                                                                                                                   | 64 (64)    | 67   | 61   | -1.8 (1.7)                 | -0.8 (1.3)                 | 0.608           | <0.00001 | ++(++)       |
| Brain                                                                                                                                | 58 (58)    | 62   | 54   | -0.8 (0.8)                 | -0.4 (0.6)                 | 0.495           | 0.00002  | ++(++)       |
| DeepGreyMatter                                                                                                                       | 64 (64)    | 62   | 66   | -1.3 (1.2)                 | -0.7 (1.3)                 | 0.428           | 0.00017  | ++(++)       |
| WhiteMatter                                                                                                                          | 63 (63)    | 61   | 64   | -0.6 (0.9)                 | -0.4 (0.7)                 | 0.310           | 0.00615  | +(o)         |
| (individual structures)                                                                                                              |            |      |      |                            |                            |                 |          |              |
| Hippocampus                                                                                                                          | 67 (67)    | 59   | 76   | -4.1 (3.2)                 | -1.7 (2.2)                 | 0.867           | <0.00001 | ++(++)       |
| LateralVentricle                                                                                                                     | 67 (68)    | 61   | 75   | 7.1 (4.6)                  | 3.6 (3.4)                  | 0.866           | <0.00001 | ++(++)       |
| InfLatVent                                                                                                                           | 69 (69)    | 63   | 75   | 6.7 (5.6)                  | 2.6 (3.8)                  | 0.845           | <0.00001 | ++(++)       |
| LeftHippocampus                                                                                                                      | 67 (68)    | 60   | 75   | -4.2 (3.3)                 | -1.7 (2.5)                 | 0.845           | <0.00001 | ++(++)       |
| LeftLateralVentricle                                                                                                                 | 66 (67)    | 60   | 73   | 7.2 (4.8)                  | 3.6 (3.5)                  | 0.836           | <0.00001 | ++(++)       |
| RightLateralVentricle                                                                                                                | 67 (67)    | 62   | 72   | 7.0 (4.6)                  | 3.6 (3.6)                  | 0.828           | <0.00001 | ++(++)       |
| MTG                                                                                                                                  | 70 (70)    | 65   | 75   | -3.1 (2.4)                 | -1.4 (1.8)                 | 0.807           | <0.00001 | ++(++)       |
| ITG                                                                                                                                  | 67 (67)    | 64   | 70   | -2.5 (2.0)                 | -1.1 (1.6)                 | 0.793           | <0.00001 | ++(++)       |
| LeftInfLatVent                                                                                                                       | 68 (69)    | 62   | 76   | 6.7 (6.2)                  | 2.4 (4.3)                  | 0.783           | <0.00001 | ++(++)       |
| EntA                                                                                                                                 | 67 (67)    | 67   | 68   | -4.0 (3.7)                 | -1.4 (3.3)                 | 0.749           | <0.00001 | ++(++)       |
| PT                                                                                                                                   | 68 (68)    | 63   | 73   | -5.5 (4.5)                 | -2.6 (3.3)                 | 0.727           | <0.00001 | ++(++)       |
| RightInfLatVent                                                                                                                      | 64 (64)    | 58   | 71   | 6.7 (6.2)                  | 2.7 (4.4)                  | 0.726           | <0.00001 | ++(++)       |
| FuG                                                                                                                                  | 66 (66)    | 63   | 69   | -1.5 (1.6)                 | -0.5 (1.1)                 | 0.694           | <0.00001 | ++(++)       |
| PP                                                                                                                                   | 66 (67)    | 64   | 70   | -5.8 (4.6)                 | -2.9 (3.9)                 | 0.692           | <0.00001 | ++(++)       |
| RightHippocampus                                                                                                                     | 65 (65)    | 57   | 73   | -4.0 (3.9)                 | -1.7 (2.8)                 | 0.677           | <0.00001 | ++(++)       |
| 3rdVentricle                                                                                                                         | 64 (64)    | 61   | 67   | 4.7 (3.8)                  | 2.5 (3.7)                  | 0.590           | <0.00001 | ++(++)       |
| Amygdala                                                                                                                             | 65 (66)    | 58   | 73   | -3.2 (4.1)                 | -1.2 (2.8)                 | 0.577           | <0.00001 | ++(++)       |
| RightAmygdala                                                                                                                        | 64 (64)    | 56   | 73   | -3.7 (5.5)                 | -1.1 (3.3)                 | 0.567           | <0.00001 | ++(++)       |
| TTG                                                                                                                                  | 61 (62)    | 61   | 62   | -4.4 (4.2)                 | -2.2 (3.5)                 | 0.558           | <0.00001 | ++(++)       |
| TMP                                                                                                                                  | 64 (64)    | 64   | 64   | -3.9 (3.7)                 | -2.2 (3.0)                 | 0.524           | <0.00001 | ++(++)       |
| Caudate                                                                                                                              | 62 (62)    | 62   | 62   | -4.8 (5.2)                 | -2.4 (3.9)                 | 0.510           | <0.00001 | ++(++)       |
| SPL                                                                                                                                  | 64 (64)    | 67   | 62   | -2.1 (2.8)                 | -0.7 (2.9)                 | 0.502           | 0.00001  | ++(++)       |
| SMG                                                                                                                                  | 62 (62)    | 61   | 62   | -2.6 (2.9)                 | -1.3 (2.5)                 | 0.489           | 0.00002  | ++(++)       |
| PHG                                                                                                                                  | 58 (58)    | 57   | 60   | -1.7 (2.2)                 | -0.7 (1.9)                 | 0.478           | 0.00003  | ++(++)       |
| MOG                                                                                                                                  | 58 (58)    | 51   | 65   | -2.0 (3.2)                 | -0.8 (2.1)                 | 0.442           | 0.00011  | ++(++)       |
| AnG                                                                                                                                  | 61 (61)    | 59   | 63   | -2.1 (2.9)                 | -1.0 (2.2)                 | 0.432           | 0.00015  | ++(++)       |
| MSFG                                                                                                                                 | 59 (59)    | 58   | 59   | -2.2 (3.0)                 | -1.0 (2.4)                 | 0.428           | 0.00017  | ++(++)       |
| AIns                                                                                                                                 | 56 (56)    | 55   | 57   | -1.5 (2.2)                 | -0.7 (1.8)                 | 0.387           | 0.00065  | ++(o)        |
| LeftAmygdala                                                                                                                         | 62 (63)    | 53   | 72   | -2.8 (4.5)                 | -1.3 (3.5)                 | 0.376           | 0.00095  | ++(o)        |
| TrIFG                                                                                                                                | 60 (60)    | 57   | 63   | -2.6 (3.0)                 | -1.6 (2.5)                 | 0.366           | 0.00127  | ++(o)        |
| BrainStem                                                                                                                            | 62 (61)    | 68   | 55   | -0.8 (0.9)                 | -0.3 (1.7)                 | 0.362           | 0.00144  | ++(o)        |
| IOG                                                                                                                                  | 56 (57)    | 52   | 62   | -1.8 (2.5)                 | -1.0 (2.1)                 | 0.347           | 0.00220  | ++(o)        |
| SMC                                                                                                                                  | 54 (54)    | 53   | 55   | -1.7 (2.9)                 | -0.8 (2.4)                 | 0.333           | 0.00328  | ++(o)        |
| OCPC                                                                                                                                 | 57 (57)    | 53   | 61   | -4.4 (13.1)                | -0.5 (10.0)                | 0.332           | 0.00337  | ++(o)        |
| OrIFG                                                                                                                                | 55 (55)    | 51   | 59   | -3.0 (3.4)                 | -1.9 (2.9)                 | 0.332           | 0.00339  | ++(o)        |
| SFG                                                                                                                                  | 58 (58)    | 55   | 61   | -2.1 (3.0)                 | -1.1 (2.9)                 | 0.318           | 0.00498  | ++(o)        |
| MFG                                                                                                                                  | 58 (58)    | 58   | 58   | -1.9 (2.7)                 | -1.1 (2.4)                 | 0.317           | 0.00516  | ++(o)        |
| PCgG                                                                                                                                 | 58 (58)    | 52   | 63   | -0.7 (1.8)                 | -0.1 (1.6)                 | 0.314           | 0.00562  | ++(o)        |
| PCu                                                                                                                                  | 55 (56)    | 53   | 58   | -1.0 (2.5)                 | -0.4 (1.9)                 | 0.295           | 0.00923  | ++(o)        |
| CerebralWhiteMatter                                                                                                                  | 62 (63)    | 60   | 65   | -0.6 (0.8)                 | -0.4 (0.7)                 | 0.284           | 0.01201  | ++(o)        |
| FO                                                                                                                                   | 55 (55)    | 51   | 60   | -1.9 (3.3)                 | -1.0 (2.8)                 | 0.284           | 0.01224  | ++(o)        |
| ThalamusProper                                                                                                                       | 65 (65)    | 55   | 76   | -2.6 (7.3)                 | -1.1 (2.8)                 | 0.273           | 0.01582  | ++(o)        |
| LiG                                                                                                                                  | 55 (55)    | 54   | 56   | -0.4 (1.5)                 | -0.0 (1.4)                 | 0.268           | 0.01794  | ++(o)        |
| OFuG                                                                                                                                 | 54 (54)    | 51   | 57   | -1.2 (2.9)                 | -0.5 (2.8)                 | 0.249           | 0.02748  | ++(o)        |
| MORg                                                                                                                                 | 55 (55)    | 53   | 56   | -1.6 (2.6)                 | -0.9 (3.1)                 | 0.245           | 0.02999  | ++(o)        |
| LORg                                                                                                                                 | 54 (54)    | 53   | 55   | -2.4 (4.1)                 | -1.3 (4.7)                 | 0.245           | 0.03029  | ++(o)        |
| Cun                                                                                                                                  | 53 (53)    | 53   | 54   | -0.5 (3.6)                 | 0.3 (3.0)                  | 0.231           | 0.04104  | ++(o)        |
| SOG                                                                                                                                  | 55 (55)    | 55   | 55   | -1.6 (4.7)                 | -0.6 (3.9)                 | 0.229           | 0.04284  | ++(o)        |
| SCA                                                                                                                                  | 57 (57)    | 58   | 56   | -2.9 (6.8)                 | -1.4 (7.1)                 | 0.225           | 0.04654  | ++(o)        |
| MFC                                                                                                                                  | 53 (53)    | 51   | 56   | -1.4 (3.9)                 | -0.5 (4.1)                 | 0.222           | 0.04980  | ++(o)        |
| OpIFG                                                                                                                                | 58 (58)    | 60   | 56   | -1.7 (3.2)                 | -1.1 (2.3)                 | 0.217           | 0.05489  | o(o)         |
| GRe                                                                                                                                  | 53 (53)    | 56   | 51   | -1.9 (5.4)                 | -0.5 (7.2)                 | 0.215           | 0.05712  | o(o)         |
| AORg                                                                                                                                 | 52 (53)    | 47   | 58   | -2.1 (4.1)                 | -1.2 (4.0)                 | 0.210           | 0.06272  | o(o)         |
| POrg                                                                                                                                 | 55 (55)    | 55   | 54   | -0.8 (2.9)                 | -0.2 (2.7)                 | 0.210           | 0.06305  | o(o)         |
| CSF                                                                                                                                  | 53 (53)    | 52   | 55   | 1.0 (3.4)                  | 0.4 (3.6)                  | 0.186           | 0.10005  | o(o)         |
| PrG                                                                                                                                  | 55 (55)    | 59   | 51   | -1.1 (2.9)                 | -0.6 (3.1)                 | 0.173           | 0.12492  | o(o)         |
| Putamen                                                                                                                              | 48 (50)    | 18   | 82   | -0.4 (3.5)                 | 0.1 (1.2)                  | 0.170           | 0.13126  | o(o)         |
| Plns                                                                                                                                 | 54 (54)    | 53   | 55   | -0.9 (2.8)                 | -0.5 (1.9)                 | 0.168           | 0.13708  | o(o)         |
| AccumbensArea                                                                                                                        | 55 (56)    | 38   | 75   | -1.3 (9.7)                 | 0.1 (7.8)                  | 0.167           | 0.13805  | o(o)         |
| ACg                                                                                                                                  | 52 (53)    | 47   | 58   | -1.3 (2.7)                 | -0.9 (2.7)                 | 0.160           | 0.15511  | o(o)         |
| CerebellarVermalLobulesI-V                                                                                                           | 55 (55)    | 51   | 59   | -0.6 (1.3)                 | -0.3 (2.1)                 | 0.153           | 0.17461  | o(o)         |
| CO                                                                                                                                   | 52 (52)    | 48   | 56   | -0.7 (2.9)                 | -0.3 (2.3)                 | 0.150           | 0.18303  | o(o)         |
| BasalForebrain                                                                                                                       | 54 (54)    | 55   | 53   | -1.5 (10.3)                | -0.1 (9.8)                 | 0.138           | 0.22106  | o(o)         |
| CerebellumExterior                                                                                                                   | 55 (56)    | 52   | 59   | -1.0 (1.6)                 | -0.8 (2.1)                 | 0.137           | 0.22484  | o(o)         |
| CerebellumWhiteMatter                                                                                                                | 56 (55)    | 66   | 44   | -0.3 (3.3)                 | 0.2 (4.1)                  | 0.128           | 0.25500  | o(o)         |
| STG                                                                                                                                  | 52 (52)    | 57   | 48   | -0.6 (2.4)                 | -0.3 (1.8)                 | 0.127           | 0.26171  | o(o)         |
| Cale                                                                                                                                 | 52 (52)    | 54   | 51   | -0.3 (3.4)                 | 0.0 (2.4)                  | 0.126           | 0.26340  | o(o)         |
| MCgG                                                                                                                                 | 49 (48)    | 51   | 46   | -0.3 (2.2)                 | -0.0 (2.2)                 | 0.118           | 0.29487  | o(o)         |
| PCg                                                                                                                                  | 52 (52)    | 55   | 49   | -1.1 (3.9)                 | -0.8 (2.9)                 | 0.095           | 0.39793  | o(o)         |
| MPgG                                                                                                                                 | 50 (50)    | 54   | 45   | -0.1 (7.2)                 | 0.4 (5.0)                  | 0.091           | 0.42142  | o(o)         |
| FRP                                                                                                                                  | 48 (48)    | 54   | 41   | -2.4 (9.7)                 | -1.6 (16.5)                | 0.056           | 0.62168  | o(o)         |
| CerebellarVermalLobulesVIII-X                                                                                                        | 48 (48)    | 47   | 49   | -0.4 (2.4)                 | -0.5 (2.8)                 | 0.056           | 0.62187  | o(o)         |
| PO                                                                                                                                   | 49 (49)    | 51   | 48   | -0.1 (3.7)                 | 0.0 (2.8)                  | 0.052           | 0.64691  | o(o)         |
| Pallidum                                                                                                                             | 49 (50)    | 38   | 62   | -0.1 (3.0)                 | 0.0 (3.0)                  | 0.051           | 0.65324  | o(o)         |
| CerebellarVermalLobulesVI-VII                                                                                                        | 47 (47)    | 46   | 47   | -0.1 (4.1)                 | 0.1 (3.7)                  | 0.050           | 0.65863  | o(o)         |
| MPrG                                                                                                                                 | 47 (47)    | 47   | 46   | -0.5 (2.8)                 | -0.5 (2.8)                 | 0.028           | 0.80310  | o(o)         |
| VentralDC                                                                                                                            | 49 (49)    | 51   | 47   | -0.6 (1.9)                 | -0.5 (3.1)                 | 0.021           | 0.85372  | o(o)         |
| 4thVentricle                                                                                                                         | 46 (47)    | 45   | 48   | 2.1 (7.0)                  | 2.0 (5.5)                  | 0.018           | 0.87648  | o(o)         |



## Longitudinal analysis (baseline→m24, AD vs. HC)

**Table 8.** Classification results in % (6-fold CV, LDA 100 runs, RF/SVM 20 runs) for distinguishing between AD and HC. Significant group differences indicated by + ( $p < 0.05$ ) and ++ ( $p < 0.001$ ). Bonferroni-corrected significance in parentheses. Sorted by effect size.

| AD patients (N=117, Positives <sup>P</sup> ) vs. Healthy Controls (N=168, Negatives <sup>N</sup> ) (longitudinal analysis, bl→m24) |            |      |      |                            |                            |                 |          |              |        |
|------------------------------------------------------------------------------------------------------------------------------------|------------|------|------|----------------------------|----------------------------|-----------------|----------|--------------|--------|
| structure                                                                                                                          | ACC (bACC) | SENS | SPEC | mean (SD) [%] <sup>P</sup> | mean (SD) [%] <sup>N</sup> | effect size (d) | p-value  | sig. (corr.) |        |
| RandomForest (all features)                                                                                                        | 89 (88)    | 81   | 94   |                            |                            |                 |          |              |        |
| SVM (all features)                                                                                                                 | 89 (88)    | 80   | 95   |                            |                            |                 |          |              |        |
| Age                                                                                                                                | 47 (47)    | 46   | 47   | 75.5 (7.7)                 | 75.9 (5.2)                 | 0.061           | 0.61542  |              | o (o)  |
| Gender (female=0, male=1)                                                                                                          | 49 (48)    | 44   | 52   | 0.5 (0.5)                  | 0.6 (0.5)                  | 0.059           | 0.62275  |              | o (o)  |
| <b>(surrogate structures)</b>                                                                                                      |            |      |      |                            |                            |                 |          |              |        |
| Ventricles                                                                                                                         | 83 (81)    | 70   | 92   | 14.7 (7.9)                 | 5.8 (3.7)                  | 1.531           | <0.00001 |              | ++(++) |
| BrainTissue                                                                                                                        | 80 (78)    | 71   | 86   | -2.6 (1.3)                 | -1.1 (0.8)                 | 1.353           | <0.00001 |              | ++(++) |
| WhiteMatter                                                                                                                        | 75 (74)    | 65   | 82   | -1.8 (1.4)                 | -0.6 (0.8)                 | 1.121           | <0.00001 |              | ++(++) |
| CorticalGreyMatter                                                                                                                 | 73 (73)    | 69   | 77   | -3.5 (2.4)                 | -1.6 (1.7)                 | 0.928           | <0.00001 |              | ++(++) |
| Brain                                                                                                                              | 68 (67)    | 65   | 70   | -1.5 (1.0)                 | -0.8 (0.7)                 | 0.847           | <0.00001 |              | ++(++) |
| DeepGreyMatter                                                                                                                     | 67 (66)    | 63   | 69   | -2.3 (1.8)                 | -1.3 (1.3)                 | 0.604           | <0.00001 |              | ++(++) |
| <b>(individual structures)</b>                                                                                                     |            |      |      |                            |                            |                 |          |              |        |
| Hippocampus                                                                                                                        | 87 (85)    | 77   | 94   | -10.2 (6.2)                | -2.0 (2.4)                 | 1.880           | <0.00001 |              | ++(++) |
| InfLatVent                                                                                                                         | 84 (83)    | 76   | 90   | 15.9 (8.8)                 | 3.5 (4.5)                  | 1.871           | <0.00001 |              | ++(++) |
| RightInfLatVent                                                                                                                    | 83 (82)    | 73   | 90   | 16.1 (9.7)                 | 3.5 (4.9)                  | 1.728           | <0.00001 |              | ++(++) |
| LeftHippocampus                                                                                                                    | 86 (84)    | 77   | 92   | -9.9 (6.6)                 | -1.9 (2.7)                 | 1.701           | <0.00001 |              | ++(++) |
| LeftInfLatVent                                                                                                                     | 80 (78)    | 69   | 88   | 15.5 (9.5)                 | 3.5 (5.2)                  | 1.652           | <0.00001 |              | ++(++) |
| MTG                                                                                                                                | 83 (81)    | 70   | 92   | -6.8 (4.1)                 | -2.0 (1.6)                 | 1.651           | <0.00001 |              | ++(++) |
| RightHippocampus                                                                                                                   | 84 (81)    | 69   | 94   | -10.5 (7.6)                | -2.0 (2.6)                 | 1.617           | <0.00001 |              | ++(++) |
| ITG                                                                                                                                | 83 (81)    | 71   | 91   | -5.3 (3.3)                 | -1.6 (1.4)                 | 1.603           | <0.00001 |              | ++(++) |
| FuG                                                                                                                                | 85 (83)    | 72   | 93   | -3.7 (2.7)                 | -0.7 (0.9)                 | 1.588           | <0.00001 |              | ++(++) |
| LeftLateralVentricle                                                                                                               | 82 (80)    | 71   | 89   | 15.6 (8.2)                 | 6.5 (4.4)                  | 1.470           | <0.00001 |              | ++(++) |
| PP                                                                                                                                 | 80 (79)    | 73   | 85   | -10.9 (6.1)                | -3.9 (3.5)                 | 1.466           | <0.00001 |              | ++(++) |
| LateralVentricle                                                                                                                   | 80 (78)    | 65   | 90   | 15.4 (8.5)                 | 6.3 (4.0)                  | 1.454           | <0.00001 |              | ++(++) |
| TMP                                                                                                                                | 84 (82)    | 75   | 90   | -8.2 (5.1)                 | -2.8 (2.5)                 | 1.430           | <0.00001 |              | ++(++) |
| RightLateralVentricle                                                                                                              | 80 (77)    | 63   | 92   | 15.1 (9.3)                 | 6.2 (4.0)                  | 1.331           | <0.00001 |              | ++(++) |
| PT                                                                                                                                 | 78 (77)    | 70   | 83   | -10.0 (6.2)                | -3.8 (3.5)                 | 1.276           | <0.00001 |              | ++(++) |
| EntA                                                                                                                               | 80 (79)    | 72   | 86   | -7.0 (5.5)                 | -2.2 (3.1)                 | 1.151           | <0.00001 |              | ++(++) |
| CerebralWhiteMatter                                                                                                                | 75 (74)    | 65   | 83   | -1.9 (1.3)                 | -0.7 (0.9)                 | 1.138           | <0.00001 |              | ++(++) |
| Amygdala                                                                                                                           | 81 (79)    | 70   | 89   | -7.3 (6.7)                 | -1.7 (3.7)                 | 1.076           | <0.00001 |              | ++(++) |
| RightAmygdala                                                                                                                      | 79 (77)    | 69   | 85   | -7.6 (7.0)                 | -1.8 (4.2)                 | 1.050           | <0.00001 |              | ++(++) |
| SMG                                                                                                                                | 71 (70)    | 61   | 78   | -5.7 (4.6)                 | -2.2 (2.6)                 | 0.968           | <0.00001 |              | ++(++) |
| AIns                                                                                                                               | 73 (73)    | 67   | 78   | -3.6 (3.4)                 | -1.1 (2.0)                 | 0.965           | <0.00001 |              | ++(++) |
| 3rdVentricle                                                                                                                       | 70 (69)    | 65   | 74   | 8.4 (5.7)                  | 4.1 (4.0)                  | 0.904           | <0.00001 |              | ++(++) |
| PHG                                                                                                                                | 73 (71)    | 65   | 78   | -3.4 (3.7)                 | -0.9 (2.0)                 | 0.901           | <0.00001 |              | ++(++) |
| LeftAmygdala                                                                                                                       | 79 (77)    | 65   | 89   | -7.1 (8.7)                 | -1.7 (3.9)                 | 0.863           | <0.00001 |              | ++(++) |
| ThalamusProper                                                                                                                     | 78 (77)    | 67   | 86   | -4.5 (3.5)                 | -2.0 (2.8)                 | 0.838           | <0.00001 |              | ++(++) |
| MSFG                                                                                                                               | 71 (70)    | 68   | 73   | -4.7 (3.9)                 | -2.1 (2.8)                 | 0.789           | <0.00001 |              | ++(++) |
| PCgG                                                                                                                               | 67 (65)    | 57   | 73   | -2.1 (2.7)                 | -0.6 (1.7)                 | 0.729           | <0.00001 |              | ++(++) |
| AnG                                                                                                                                | 69 (67)    | 60   | 75   | -4.5 (4.4)                 | -2.0 (2.7)                 | 0.718           | <0.00001 |              | ++(++) |
| FO                                                                                                                                 | 69 (68)    | 58   | 77   | -4.8 (5.5)                 | -1.8 (3.0)                 | 0.706           | <0.00001 |              | ++(++) |
| TTG                                                                                                                                | 70 (70)    | 65   | 74   | -7.0 (6.8)                 | -3.4 (3.3)                 | 0.705           | <0.00001 |              | ++(++) |
| IOG                                                                                                                                | 64 (63)    | 57   | 70   | -3.8 (3.5)                 | -1.8 (2.5)                 | 0.671           | <0.00001 |              | ++(++) |
| POrG                                                                                                                               | 61 (61)    | 63   | 59   | -2.7 (3.0)                 | -0.9 (2.7)                 | 0.628           | <0.00001 |              | ++(++) |
| PCu                                                                                                                                | 69 (67)    | 58   | 76   | -2.7 (3.7)                 | -1.0 (2.2)                 | 0.601           | <0.00001 |              | ++(++) |
| SMC                                                                                                                                | 62 (62)    | 57   | 66   | -3.9 (3.9)                 | -2.0 (2.5)                 | 0.595           | <0.00001 |              | ++(++) |
| OrIFG                                                                                                                              | 63 (62)    | 58   | 67   | -4.8 (4.7)                 | -2.5 (3.6)                 | 0.573           | <0.00001 |              | ++(++) |
| MFG                                                                                                                                | 61 (60)    | 58   | 63   | -3.5 (3.8)                 | -1.9 (2.6)                 | 0.521           | 0.00002  |              | ++ (+) |
| MOrG                                                                                                                               | 64 (63)    | 61   | 66   | -3.3 (4.5)                 | -1.4 (3.1)                 | 0.509           | 0.00003  |              | ++ (+) |
| ACg                                                                                                                                | 62 (60)    | 50   | 70   | -3.3 (4.0)                 | -1.7 (2.4)                 | 0.505           | 0.00004  |              | ++ (+) |
| BrainStem                                                                                                                          | 60 (59)    | 53   | 65   | -1.5 (1.4)                 | -1.0 (1.0)                 | 0.456           | 0.00018  |              | ++ (+) |
| MOG                                                                                                                                | 61 (60)    | 58   | 63   | -3.1 (4.0)                 | -1.3 (4.2)                 | 0.452           | 0.00021  |              | ++ (+) |
| SPL                                                                                                                                | 64 (64)    | 63   | 65   | -3.6 (5.0)                 | -1.7 (3.9)                 | 0.446           | 0.00025  |              | ++ (+) |
| TriFG                                                                                                                              | 62 (60)    | 54   | 67   | -3.8 (3.5)                 | -2.4 (2.9)                 | 0.443           | 0.00028  |              | ++ (+) |
| LOrG                                                                                                                               | 62 (61)    | 53   | 69   | -4.9 (6.1)                 | -2.5 (5.5)                 | 0.426           | 0.00047  |              | ++ (+) |
| OpIFG                                                                                                                              | 60 (59)    | 57   | 62   | -3.5 (3.7)                 | -2.1 (2.9)                 | 0.423           | 0.00051  |              | ++ (+) |
| CSF                                                                                                                                | 59 (58)    | 58   | 59   | 2.0 (5.1)                  | 0.1 (4.1)                  | 0.412           | 0.00072  |              | ++ (o) |
| SCA                                                                                                                                | 63 (63)    | 61   | 64   | -5.9 (13.2)                | -2.1 (6.2)                 | 0.388           | 0.00141  |              | + (o)  |
| MFC                                                                                                                                | 61 (60)    | 55   | 65   | -3.4 (5.6)                 | -1.7 (4.0)                 | 0.354           | 0.00356  |              | + (o)  |
| GRe                                                                                                                                | 64 (63)    | 61   | 66   | -4.3 (8.0)                 | -1.7 (6.9)                 | 0.347           | 0.00427  |              | + (o)  |
| OPuG                                                                                                                               | 59 (59)    | 60   | 58   | -1.6 (3.1)                 | -0.6 (3.0)                 | 0.331           | 0.00636  |              | + (o)  |
| Caudate                                                                                                                            | 61 (61)    | 58   | 63   | -5.9 (9.5)                 | -3.6 (4.4)                 | 0.328           | 0.00683  |              | + (o)  |
| STG                                                                                                                                | 55 (55)    | 52   | 58   | -1.7 (3.2)                 | -0.9 (2.0)                 | 0.306           | 0.01145  |              | + (o)  |
| PrG                                                                                                                                | 58 (58)    | 60   | 57   | -2.7 (3.8)                 | -1.8 (3.4)                 | 0.252           | 0.03747  |              | + (o)  |
| AOrG                                                                                                                               | 54 (54)    | 53   | 55   | -2.6 (4.9)                 | -1.6 (3.4)                 | 0.243           | 0.04413  |              | + (o)  |
| 4thVentricle                                                                                                                       | 60 (59)    | 55   | 63   | 3.8 (7.0)                  | 2.3 (5.8)                  | 0.240           | 0.04731  |              | + (o)  |
| SFG                                                                                                                                | 57 (57)    | 59   | 55   | -2.7 (4.0)                 | -2.0 (3.2)                 | 0.209           | 0.08426  |              | o (o)  |
| CerebellumExterior                                                                                                                 | 60 (60)    | 56   | 63   | -1.9 (2.9)                 | -1.4 (2.0)                 | 0.200           | 0.09756  |              | o (o)  |
| LiG                                                                                                                                | 53 (53)    | 56   | 51   | -0.8 (3.1)                 | -0.3 (2.3)                 | 0.193           | 0.10963  |              | o (o)  |
| Putamen                                                                                                                            | 59 (53)    | 22   | 84   | -0.4 (3.0)                 | 0.1 (2.0)                  | 0.192           | 0.11187  |              | o (o)  |
| MCgG                                                                                                                               | 57 (57)    | 56   | 57   | -1.3 (3.4)                 | -0.7 (2.3)                 | 0.190           | 0.11579  |              | o (o)  |
| VentralDC                                                                                                                          | 57 (57)    | 53   | 61   | -1.3 (1.8)                 | -1.0 (2.4)                 | 0.180           | 0.13700  |              | o (o)  |
| SOG                                                                                                                                | 58 (58)    | 59   | 56   | -2.6 (5.8)                 | -1.5 (6.6)                 | 0.175           | 0.14836  |              | o (o)  |
| Pallidum                                                                                                                           | 52 (53)    | 62   | 45   | 0.2 (3.5)                  | -0.2 (2.0)                 | 0.164           | 0.17299  |              | o (o)  |
| CerebellarVermalLobulesI-V                                                                                                         | 54 (52)    | 43   | 62   | -1.3 (3.5)                 | -0.7 (4.4)                 | 0.164           | 0.17424  |              | o (o)  |
| Plns                                                                                                                               | 54 (53)    | 52   | 55   | -1.7 (4.1)                 | -1.2 (2.7)                 | 0.141           | 0.24371  |              | o (o)  |
| PO                                                                                                                                 | 52 (51)    | 48   | 54   | -1.6 (4.6)                 | -1.2 (3.2)                 | 0.109           | 0.36791  |              | o (o)  |
| FRP                                                                                                                                | 58 (57)    | 50   | 63   | -5.3 (18.9)                | -3.6 (14.8)                | 0.107           | 0.37505  |              | o (o)  |
| CO                                                                                                                                 | 53 (52)    | 48   | 56   | -1.9 (4.2)                 | -1.6 (3.1)                 | 0.105           | 0.38495  |              | o (o)  |
| Cun                                                                                                                                | 54 (53)    | 49   | 58   | -0.1 (4.8)                 | -0.6 (7.4)                 | 0.077           | 0.52528  |              | o (o)  |
| MPrG                                                                                                                               | 48 (48)    | 44   | 51   | -1.1 (8.5)                 | -1.6 (5.5)                 | 0.074           | 0.54109  |              | o (o)  |
| BasalForebrain                                                                                                                     | 48 (48)    | 48   | 48   | -2.6 (16.4)                | -3.4 (9.7)                 | 0.062           | 0.60717  |              | o (o)  |
| AccumbensArea                                                                                                                      | 58 (52)    | 18   | 86   | 2.6 (60.0)                 | 0.1 (16.1)                 | 0.061           | 0.61555  |              | o (o)  |
| CerebellumWhiteMatter                                                                                                              | 49 (52)    | 69   | 35   | 0.1 (7.1)                  | 0.4 (4.8)                  | 0.057           | 0.63523  |              | o (o)  |
| MPrG                                                                                                                               | 48 (48)    | 46   | 50   | -1.8 (3.9)                 | -1.7 (3.7)                 | 0.043           | 0.71987  |              | o (o)  |
| CerebellarVermalLobulesVIII-X                                                                                                      | 46 (47)    | 53   | 40   | -1.0 (3.0)                 | -1.2 (6.2)                 | 0.039           | 0.74661  |              | o (o)  |
| POg                                                                                                                                | 48 (47)    | 47   | 48   | -1.9 (5.0)                 | -1.7 (4.1)                 | 0.027           | 0.82435  |              | o (o)  |
| OCP                                                                                                                                | 49 (49)    | 48   | 49   | -2.4 (17.0)                | -2.1 (17.1)                | 0.015           | 0.90207  |              | o (o)  |
| CerebellarVermalLobulesVI-VII                                                                                                      | 47 (47)    | 46   | 48   | -0.3 (4.7)                 | -0.4 (4.5)                 | 0.014           | 0.90530  |              | o (o)  |
| Calc                                                                                                                               | 47 (46)    | 43   | 49   | -0.8 (4.8)                 | -0.8 (3.3)                 | 0.013           | 0.91102  |              | o (o)  |

## Longitudinal analysis (baseline→m24, pMCI vs. sMCI)

**Table 9.** Classification results in % (6-fold CV, LDA 100 runs, RF/SVM 20 runs) for distinguishing between pMCI and sMCI. Significant group differences indicated by + ( $p < 0.05$ ) and ++ ( $p < 0.001$ ). Bonferroni-corrected significance in parentheses. Sorted by effect size.

| progressive MCI (N = 140, Positives <sup>P</sup> ) vs. stable MCI (N = 107, Negatives <sup>N</sup> ) (longitudinal analysis, bl→m24) |            |      |      |                            |                            |                 |          |              |        |
|--------------------------------------------------------------------------------------------------------------------------------------|------------|------|------|----------------------------|----------------------------|-----------------|----------|--------------|--------|
| structure                                                                                                                            | ACC (bACC) | SENS | SPEC | mean (SD) [%] <sup>P</sup> | mean (SD) [%] <sup>N</sup> | effect size (d) | p-value  | sig. (corr.) |        |
| RandomForest (all features)                                                                                                          | 79 (78)    | 82   | 74   |                            |                            |                 |          |              |        |
| SVM (all features)                                                                                                                   | 76 (76)    | 76   | 76   |                            |                            |                 |          |              |        |
| Age                                                                                                                                  | 54 (54)    | 51   | 58   | 73.3 (7.8)                 | 74.7 (7.5)                 | 0.176           | 0.17108  |              | o (o)  |
| Gender (female = 0, male = 1)                                                                                                        | 46 (47)    | 40   | 54   | 0.6 (0.5)                  | 0.6 (0.5)                  | 0.053           | 0.67739  |              | o (o)  |
| <b>(surrogate structures)</b>                                                                                                        |            |      |      |                            |                            |                 |          |              |        |
| Ventricles                                                                                                                           | 71 (72)    | 65   | 80   | 13.7 (7.4)                 | 7.1 (5.6)                  | 0.989           | <0.00001 |              | ++(++) |
| BrainTissue                                                                                                                          | 68 (69)    | 62   | 76   | -2.3 (1.5)                 | -1.2 (1.0)                 | 0.845           | <0.00001 |              | ++(++) |
| DeepGreyMatter                                                                                                                       | 66 (67)    | 64   | 69   | -2.1 (1.4)                 | -1.2 (1.0)                 | 0.714           | <0.00001 |              | ++(++) |
| CorticalGreyMatter                                                                                                                   | 65 (66)    | 61   | 71   | -3.2 (2.5)                 | -1.7 (1.6)                 | 0.707           | <0.00001 |              | ++(++) |
| Brain                                                                                                                                | 63 (63)    | 60   | 67   | -1.5 (1.1)                 | -0.8 (0.7)                 | 0.707           | <0.00001 |              | ++(++) |
| WhiteMatter                                                                                                                          | 64 (65)    | 55   | 74   | -1.6 (1.3)                 | -0.8 (1.0)                 | 0.661           | <0.00001 |              | ++(++) |
| <b>(individual structures)</b>                                                                                                       |            |      |      |                            |                            |                 |          |              |        |
| FuG                                                                                                                                  | 75 (76)    | 69   | 83   | -3.1 (2.1)                 | -1.0 (1.4)                 | 1.141           | <0.00001 |              | ++(++) |
| Hippocampus                                                                                                                          | 73 (74)    | 68   | 80   | -8.9 (5.1)                 | -3.7 (3.8)                 | 1.118           | <0.00001 |              | ++(++) |
| LeftHippocampus                                                                                                                      | 74 (74)    | 72   | 77   | -9.3 (5.6)                 | -3.8 (4.2)                 | 1.083           | <0.00001 |              | ++(++) |
| EntA                                                                                                                                 | 71 (72)    | 66   | 77   | -7.4 (4.7)                 | -2.8 (3.6)                 | 1.070           | <0.00001 |              | ++(++) |
| InfLatVent                                                                                                                           | 70 (72)    | 62   | 81   | 14.6 (8.9)                 | 6.2 (6.6)                  | 1.053           | <0.00001 |              | ++(++) |
| MTG                                                                                                                                  | 72 (74)    | 64   | 83   | -6.1 (3.9)                 | -2.6 (2.6)                 | 1.016           | <0.00001 |              | ++(++) |
| LeftInfLatVent                                                                                                                       | 68 (69)    | 60   | 79   | 14.7 (9.4)                 | 6.4 (6.8)                  | 0.987           | <0.00001 |              | ++(++) |
| PT                                                                                                                                   | 68 (68)    | 62   | 75   | -9.7 (5.6)                 | -4.7 (4.2)                 | 0.971           | <0.00001 |              | ++(++) |
| LateralVentricle                                                                                                                     | 70 (71)    | 64   | 78   | 14.4 (7.9)                 | 7.5 (6.0)                  | 0.960           | <0.00001 |              | ++(++) |
| ITG                                                                                                                                  | 72 (73)    | 66   | 80   | -4.7 (2.9)                 | -2.1 (2.2)                 | 0.958           | <0.00001 |              | ++(++) |
| LeftLateralVentricle                                                                                                                 | 69 (70)    | 62   | 77   | 14.6 (8.2)                 | 7.6 (6.1)                  | 0.956           | <0.00001 |              | ++(++) |
| RightInfLatVent                                                                                                                      | 66 (68)    | 60   | 76   | 14.3 (10.1)                | 5.9 (7.4)                  | 0.923           | <0.00001 |              | ++(++) |
| RightHippocampus                                                                                                                     | 71 (72)    | 65   | 79   | -8.6 (5.7)                 | -3.7 (4.6)                 | 0.920           | <0.00001 |              | ++(++) |
| RightLateralVentricle                                                                                                                | 69 (70)    | 61   | 79   | 14.1 (8.1)                 | 7.5 (6.3)                  | 0.907           | <0.00001 |              | ++(++) |
| Amygdala                                                                                                                             | 67 (68)    | 61   | 76   | -6.4 (5.2)                 | -2.9 (3.5)                 | 0.770           | <0.00001 |              | ++(++) |
| TTG                                                                                                                                  | 65 (66)    | 62   | 70   | -8.0 (5.3)                 | -4.4 (4.1)                 | 0.752           | <0.00001 |              | ++(++) |
| PHG                                                                                                                                  | 66 (68)    | 58   | 77   | -3.5 (2.8)                 | -1.5 (2.4)                 | 0.746           | <0.00001 |              | ++(++) |
| 3rdVentricle                                                                                                                         | 64 (65)    | 61   | 68   | 9.1 (6.2)                  | 4.7 (5.5)                  | 0.740           | <0.00001 |              | ++(++) |
| PP                                                                                                                                   | 68 (69)    | 65   | 72   | -10.0 (5.7)                | -5.9 (5.5)                 | 0.728           | <0.00001 |              | ++(++) |
| TMP                                                                                                                                  | 68 (69)    | 64   | 74   | -6.9 (4.5)                 | -3.9 (3.6)                 | 0.721           | <0.00001 |              | ++(++) |
| RightAmygdala                                                                                                                        | 67 (68)    | 62   | 73   | -6.5 (6.3)                 | -2.7 (4.3)                 | 0.688           | <0.00001 |              | ++(++) |
| CerebralWhiteMatter                                                                                                                  | 65 (66)    | 58   | 73   | -1.6 (1.3)                 | -0.9 (1.0)                 | 0.635           | <0.00001 |              | ++(++) |
| SMG                                                                                                                                  | 62 (64)    | 54   | 74   | -4.8 (4.0)                 | -2.5 (2.8)                 | 0.633           | <0.00001 |              | ++(++) |
| LeftAmygdala                                                                                                                         | 65 (66)    | 60   | 72   | -6.4 (6.0)                 | -3.2 (4.2)                 | 0.605           | <0.00001 |              | ++(++) |
| PCgG                                                                                                                                 | 62 (62)    | 57   | 67   | -1.7 (2.3)                 | -0.5 (1.6)                 | 0.577           | 0.00001  |              | ++(++) |
| MOG                                                                                                                                  | 63 (64)    | 55   | 74   | -3.3 (4.1)                 | -1.3 (2.8)                 | 0.570           | 0.00001  |              | ++(++) |
| MSFG                                                                                                                                 | 63 (63)    | 59   | 67   | -4.2 (4.0)                 | -2.2 (3.0)                 | 0.551           | 0.00003  |              | ++(++) |
| AIns                                                                                                                                 | 58 (59)    | 53   | 66   | -2.8 (3.0)                 | -1.4 (2.0)                 | 0.529           | 0.00005  |              | ++(++) |
| SCA                                                                                                                                  | 65 (65)    | 69   | 61   | -5.8 (8.0)                 | -2.1 (7.1)                 | 0.480           | 0.00023  |              | ++(++) |
| AnG                                                                                                                                  | 61 (62)    | 56   | 69   | -3.9 (4.9)                 | -2.0 (2.8)                 | 0.478           | 0.00024  |              | ++(++) |
| BrainStem                                                                                                                            | 58 (58)    | 59   | 57   | -1.3 (1.4)                 | -0.6 (1.4)                 | 0.462           | 0.00038  |              | ++(++) |
| FO                                                                                                                                   | 61 (63)    | 52   | 73   | -4.5 (5.6)                 | -2.3 (3.7)                 | 0.462           | 0.00039  |              | ++(++) |
| CerebellumExterior                                                                                                                   | 65 (65)    | 64   | 66   | -1.9 (2.0)                 | -1.1 (1.3)                 | 0.434           | 0.00085  |              | ++(++) |
| MFG                                                                                                                                  | 58 (59)    | 54   | 64   | -3.3 (3.7)                 | -2.0 (2.4)                 | 0.432           | 0.00090  |              | ++(++) |
| PCu                                                                                                                                  | 61 (62)    | 58   | 65   | -2.3 (3.9)                 | -1.0 (2.0)                 | 0.430           | 0.00093  |              | ++(++) |
| IOG                                                                                                                                  | 63 (64)    | 59   | 69   | -3.1 (3.8)                 | -1.7 (2.4)                 | 0.417           | 0.00133  |              | ++(++) |
| SPL                                                                                                                                  | 62 (61)    | 63   | 59   | -3.4 (4.7)                 | -1.7 (3.3)                 | 0.408           | 0.00167  |              | ++(++) |
| LiG                                                                                                                                  | 58 (57)    | 59   | 55   | -0.9 (2.2)                 | -0.1 (2.0)                 | 0.405           | 0.00181  |              | ++(++) |
| MOrG                                                                                                                                 | 59 (59)    | 58   | 60   | -3.0 (2.9)                 | -1.8 (3.5)                 | 0.398           | 0.00218  |              | ++(++) |
| OCp                                                                                                                                  | 59 (58)    | 61   | 56   | -3.9 (11.9)                | 0.0 (9.7)                  | 0.352           | 0.00660  |              | ++(++) |
| AccumbensArea                                                                                                                        | 63 (65)    | 52   | 77   | -2.3 (5.5)                 | -0.5 (5.1)                 | 0.342           | 0.00827  |              | ++(++) |
| ThalamusProper                                                                                                                       | 66 (67)    | 56   | 79   | -4.7 (8.7)                 | -2.4 (2.5)                 | 0.341           | 0.00844  |              | ++(++) |
| SMC                                                                                                                                  | 54 (55)    | 51   | 59   | -3.3 (3.8)                 | -2.1 (2.8)                 | 0.335           | 0.00972  |              | ++(++) |
| TriFG                                                                                                                                | 58 (59)    | 52   | 65   | -3.7 (3.7)                 | -2.7 (2.6)                 | 0.320           | 0.01334  |              | ++(++) |
| CSF                                                                                                                                  | 58 (58)    | 60   | 56   | 1.3 (5.1)                  | -0.1 (4.0)                 | 0.318           | 0.01404  |              | ++(++) |
| LORg                                                                                                                                 | 57 (58)    | 53   | 62   | -4.2 (4.4)                 | -2.8 (5.1)                 | 0.309           | 0.01673  |              | ++(++) |
| OrIFG                                                                                                                                | 59 (59)    | 53   | 65   | -4.5 (5.0)                 | -3.1 (3.4)                 | 0.309           | 0.01695  |              | ++(++) |
| Caudate                                                                                                                              | 59 (59)    | 57   | 61   | -5.6 (8.1)                 | -3.5 (5.8)                 | 0.302           | 0.01965  |              | ++(++) |
| CerebellumWhiteMatter                                                                                                                | 61 (59)    | 73   | 45   | -0.6 (2.7)                 | 0.3 (3.3)                  | 0.300           | 0.02030  |              | ++(++) |
| STG                                                                                                                                  | 58 (58)    | 52   | 65   | -1.5 (3.3)                 | -0.7 (2.1)                 | 0.294           | 0.02284  |              | ++(++) |
| OpIFG                                                                                                                                | 58 (58)    | 53   | 63   | -3.1 (4.5)                 | -2.0 (2.4)                 | 0.287           | 0.02644  |              | ++(++) |
| AOrG                                                                                                                                 | 55 (56)    | 51   | 60   | -3.2 (5.1)                 | -1.9 (4.0)                 | 0.285           | 0.02752  |              | ++(++) |
| SOG                                                                                                                                  | 57 (57)    | 56   | 57   | -2.9 (5.7)                 | -1.6 (3.7)                 | 0.269           | 0.03737  |              | ++(++) |
| ACg                                                                                                                                  | 55 (55)    | 52   | 59   | -2.7 (3.8)                 | -1.8 (3.1)                 | 0.261           | 0.04334  |              | ++(++) |
| SFG                                                                                                                                  | 59 (60)    | 56   | 64   | -2.9 (3.8)                 | -2.0 (2.8)                 | 0.253           | 0.05003  |              | o(o)   |
| Cale                                                                                                                                 | 58 (57)    | 64   | 51   | -0.7 (4.9)                 | 0.4 (4.4)                  | 0.241           | 0.06227  |              | o(o)   |
| MFC                                                                                                                                  | 58 (60)    | 49   | 70   | -3.9 (5.9)                 | -2.6 (4.6)                 | 0.237           | 0.06573  |              | o(o)   |
| POrG                                                                                                                                 | 55 (55)    | 55   | 55   | -2.0 (3.2)                 | -1.3 (2.8)                 | 0.236           | 0.06716  |              | o(o)   |
| GRe                                                                                                                                  | 59 (60)    | 52   | 67   | -4.4 (6.6)                 | -3.0 (5.7)                 | 0.229           | 0.07521  |              | o(o)   |
| PrG                                                                                                                                  | 55 (55)    | 56   | 53   | -2.2 (3.7)                 | -1.4 (3.0)                 | 0.229           | 0.07632  |              | o(o)   |
| CO                                                                                                                                   | 54 (54)    | 50   | 59   | -1.8 (4.5)                 | -1.0 (3.0)                 | 0.193           | 0.13491  |              | o(o)   |
| Plns                                                                                                                                 | 53 (54)    | 51   | 57   | -1.8 (3.2)                 | -1.3 (2.4)                 | 0.192           | 0.13540  |              | o(o)   |
| OFuG                                                                                                                                 | 57 (57)    | 57   | 58   | -1.5 (3.7)                 | -1.0 (2.3)                 | 0.166           | 0.19645  |              | o(o)   |
| PO                                                                                                                                   | 56 (56)    | 53   | 59   | -1.2 (5.0)                 | -0.5 (3.5)                 | 0.165           | 0.19971  |              | o(o)   |
| FRP                                                                                                                                  | 56 (56)    | 55   | 57   | -4.9 (13.3)                | -3.0 (16.1)                | 0.129           | 0.31612  |              | o(o)   |
| CerebellarVermalLobulesI-V                                                                                                           | 56 (56)    | 54   | 58   | -1.1 (2.1)                 | -0.8 (2.1)                 | 0.128           | 0.31896  |              | o(o)   |
| Pallidum                                                                                                                             | 48 (52)    | 23   | 81   | 0.4 (4.3)                  | -0.0 (2.1)                 | 0.118           | 0.35737  |              | o(o)   |
| CerebellarVermalLobulesVIII-X                                                                                                        | 51 (52)    | 49   | 55   | -1.1 (2.7)                 | -0.8 (2.2)                 | 0.118           | 0.36012  |              | o(o)   |
| MCgG                                                                                                                                 | 51 (51)    | 51   | 50   | -1.1 (2.9)                 | -0.8 (2.4)                 | 0.117           | 0.36161  |              | o(o)   |
| PaG                                                                                                                                  | 52 (52)    | 52   | 52   | -1.7 (4.7)                 | -1.4 (3.2)                 | 0.092           | 0.47252  |              | o(o)   |
| CerebellarVermalLobulesVI-VII                                                                                                        | 51 (51)    | 49   | 52   | -0.8 (4.7)                 | -0.4 (4.2)                 | 0.085           | 0.50816  |              | o(o)   |
| 4thVentricle                                                                                                                         | 54 (54)    | 50   | 58   | 2.7 (7.4)                  | 2.2 (6.0)                  | 0.076           | 0.55268  |              | o(o)   |
| MPrG                                                                                                                                 | 51 (51)    | 54   | 48   | -1.5 (3.6)                 | -1.3 (3.0)                 | 0.072           | 0.57329  |              | o(o)   |
| BasalForebrain                                                                                                                       | 47 (46)    | 48   | 45   | -2.7 (13.1)                | -1.9 (10.0)                | 0.066           | 0.60690  |              | o(o)   |
| VentralDC                                                                                                                            | 51 (51)    | 52   | 50   | -1.1 (2.5)                 | -0.9 (2.3)                 | 0.060           | 0.64346  |              | o(o)   |
| Putamen                                                                                                                              | 47 (49)    | 40   | 57   | -0.1 (2.0)                 | -0.0 (0.7)                 | 0.034           | 0.79321  |              | o(o)   |
| Cun                                                                                                                                  | 46 (46)    | 45   | 47   | -0.1 (4.3)                 | -0.1 (2.6)                 | 0.003           | 0.98036  |              | o(o)   |
| MPoG                                                                                                                                 | 47 (47)    | 46   | 47   | -0.8 (6.7)                 | -0.8 (4.1)                 | 0.001           | 0.99373  |              | o(o)   |
